# Supplementary material for: Anticancer Immunotherapy by MFAP5 Blockade Inhibits Fibrosis and Enhances Chemosensitivity in Ovarian and Pancreatic Cancer
Source: Oxford University Press journal article supplement (doi:10.1158/1078-0432.ccr-19-0187), 2019-07-22
Supplement: 10780432ccr190187-sup-215569_3_supp_5590618_pt85b5.xlsx [file 10780432ccr190187-sup-215569_3_supp_5590618_pt85b5.xlsx]

## Sheet: Sheet1
Probe Set ID	Gene Symbol	Entrez Gene	Gene Ontology Biological Process	Gene Ontology Cellular Component	Gene Ontology Molecular Function	Alignments
201438_at	COL6A3	1293	0007155 // cell adhesion // inferred from electronic annotation///0007411 // axon guidance // traceable author statement///0007517 // muscle organ development // traceable author statement///0010466 // negative regulation of peptidase activity // inferred from electronic annotation///0010951 // negative regulation of endopeptidase activity // inferred from electronic annotation///0022617 // extra…	0005576 // extracellular region // traceable author statement///0005578 // proteinaceous extracellular matrix // inferred from direct assay///0005581 // collagen trimer // inferred from electronic annotation///0005589 // collagen type VI trimer // traceable author statement///0005615 // extracellular space // inferred from direct assay///0005788 // endoplasmic reticulum lumen // traceable author …	0004867 // serine-type endopeptidase inhibitor activity // inferred from electronic annotation///0005515 // protein binding // inferred from electronic annotation///0030414 // peptidase inhibitor activity // inferred from electronic annotation	chr2:238232660-238322820 (-) // 99.33 // q37.3
201852_x_at	COL3A1	1281	0001501 // skeletal system development // inferred from electronic annotation///0001568 // blood vessel development // inferred from electronic annotation///0006898 // receptor-mediated endocytosis // traceable author statement///0007160 // cell-matrix adhesion // inferred from direct assay///0007179 // transforming growth factor beta receptor signaling pathway // inferred from direct assay///000…	0005576 // extracellular region // traceable author statement///0005578 // proteinaceous extracellular matrix // inferred from electronic annotation///0005581 // collagen trimer // inferred from electronic annotation///0005586 // collagen type III trimer // inferred from mutant phenotype///0005586 // collagen type III trimer // non-traceable author statement///0005615 // extracellular space // in…	0005178 // integrin binding // inferred from mutant phenotype///0005178 // integrin binding // non-traceable author statement///0005201 // extracellular matrix structural constituent // inferred from mutant phenotype///0005515 // protein binding // inferred from physical interaction///0046332 // SMAD binding // inferred from electronic annotation///0046872 // metal ion binding // inferred from el…	chr2:189839109-189877469 (+) // 99.18 // q32.2
202310_s_at	COL1A1	1277	0001501 // skeletal system development // inferred from mutant phenotype///0001503 // ossification // inferred from electronic annotation///0001568 // blood vessel development // inferred from mutant phenotype///0001649 // osteoblast differentiation // inferred from electronic annotation///0001957 // intramembranous ossification // inferred from electronic annotation///0001958 // endochondral oss…	0005576 // extracellular region // traceable author statement///0005578 // proteinaceous extracellular matrix // inferred from electronic annotation///0005581 // collagen trimer // inferred from electronic annotation///0005584 // collagen type I trimer // inferred from mutant phenotype///0005615 // extracellular space // inferred from direct assay///0005737 // cytoplasm // inferred from electroni…	0005201 // extracellular matrix structural constituent // inferred from electronic annotation///0005515 // protein binding // inferred from physical interaction///0042802 // identical protein binding // inferred from direct assay///0046872 // metal ion binding // inferred from electronic annotation///0048407 // platelet-derived growth factor binding // inferred from direct assay	chr17:48260649-48278993 (-) // 97.0 // q21.33
202311_s_at	COL1A1	1277	0001501 // skeletal system development // inferred from mutant phenotype///0001503 // ossification // inferred from electronic annotation///0001568 // blood vessel development // inferred from mutant phenotype///0001649 // osteoblast differentiation // inferred from electronic annotation///0001957 // intramembranous ossification // inferred from electronic annotation///0001958 // endochondral oss…	0005576 // extracellular region // traceable author statement///0005578 // proteinaceous extracellular matrix // inferred from electronic annotation///0005581 // collagen trimer // inferred from electronic annotation///0005584 // collagen type I trimer // inferred from mutant phenotype///0005615 // extracellular space // inferred from direct assay///0005737 // cytoplasm // inferred from electroni…	0005201 // extracellular matrix structural constituent // inferred from electronic annotation///0005515 // protein binding // inferred from physical interaction///0042802 // identical protein binding // inferred from direct assay///0046872 // metal ion binding // inferred from electronic annotation///0048407 // platelet-derived growth factor binding // inferred from direct assay	chr17:48260649-48278993 (-) // 97.0 // q21.33
202312_s_at	COL1A1	1277	0001501 // skeletal system development // inferred from mutant phenotype///0001503 // ossification // inferred from electronic annotation///0001568 // blood vessel development // inferred from mutant phenotype///0001649 // osteoblast differentiation // inferred from electronic annotation///0001957 // intramembranous ossification // inferred from electronic annotation///0001958 // endochondral oss…	0005576 // extracellular region // traceable author statement///0005578 // proteinaceous extracellular matrix // inferred from electronic annotation///0005581 // collagen trimer // inferred from electronic annotation///0005584 // collagen type I trimer // inferred from mutant phenotype///0005615 // extracellular space // inferred from direct assay///0005737 // cytoplasm // inferred from electroni…	0005201 // extracellular matrix structural constituent // inferred from electronic annotation///0005515 // protein binding // inferred from physical interaction///0042802 // identical protein binding // inferred from direct assay///0046872 // metal ion binding // inferred from electronic annotation///0048407 // platelet-derived growth factor binding // inferred from direct assay	chr17:48260649-48278993 (-) // 97.7 // q21.33
202403_s_at	COL1A2	1278	0001501 // skeletal system development // inferred from mutant phenotype///0001568 // blood vessel development // inferred from mutant phenotype///0006898 // receptor-mediated endocytosis // traceable author statement///0007179 // transforming growth factor beta receptor signaling pathway // inferred from direct assay///0007266 // Rho protein signal transduction // inferred from direct assay///00…	0005576 // extracellular region // traceable author statement///0005578 // proteinaceous extracellular matrix // inferred from electronic annotation///0005581 // collagen trimer // inferred from electronic annotation///0005584 // collagen type I trimer // inferred from direct assay///0005584 // collagen type I trimer // inferred from mutant phenotype///0005584 // collagen type I trimer // traceab…	0005201 // extracellular matrix structural constituent // non-traceable author statement///0005515 // protein binding // inferred from physical interaction///0030674 // protein binding, bridging // inferred from mutant phenotype///0042802 // identical protein binding // inferred from direct assay///0046332 // SMAD binding // inferred from electronic annotation///0046872 // metal ion binding // in…	chr7:94023872-94060537 (+) // 98.44 // q21.3
202404_s_at	COL1A2	1278	0001501 // skeletal system development // inferred from mutant phenotype///0001568 // blood vessel development // inferred from mutant phenotype///0006898 // receptor-mediated endocytosis // traceable author statement///0007179 // transforming growth factor beta receptor signaling pathway // inferred from direct assay///0007266 // Rho protein signal transduction // inferred from direct assay///00…	0005576 // extracellular region // traceable author statement///0005578 // proteinaceous extracellular matrix // inferred from electronic annotation///0005581 // collagen trimer // inferred from electronic annotation///0005584 // collagen type I trimer // inferred from direct assay///0005584 // collagen type I trimer // inferred from mutant phenotype///0005584 // collagen type I trimer // traceab…	0005201 // extracellular matrix structural constituent // non-traceable author statement///0005515 // protein binding // inferred from physical interaction///0030674 // protein binding, bridging // inferred from mutant phenotype///0042802 // identical protein binding // inferred from direct assay///0046332 // SMAD binding // inferred from electronic annotation///0046872 // metal ion binding // in…	chr7:94024206-94060544 (+) // 99.08 // q21.3
203325_s_at	COL5A1	1289	0001568 // blood vessel development // inferred from electronic annotation///0003007 // heart morphogenesis // inferred from electronic annotation///0007155 // cell adhesion // inferred from mutant phenotype///0007411 // axon guidance // traceable author statement///0016477 // cell migration // inferred from mutant phenotype///0022617 // extracellular matrix disassembly // traceable author statem…	0005576 // extracellular region // traceable author statement///0005578 // proteinaceous extracellular matrix // inferred from electronic annotation///0005581 // collagen trimer // inferred from electronic annotation///0005588 // collagen type V trimer // inferred from mutant phenotype///0005604 // basement membrane // inferred from electronic annotation///0005788 // endoplasmic reticulum lumen /…	0005178 // integrin binding // non-traceable author statement///0005201 // extracellular matrix structural constituent // inferred from electronic annotation///0005515 // protein binding // inferred from electronic annotation///0008201 // heparin binding // inferred from direct assay///0043394 // proteoglycan binding // inferred from physical interaction///0046872 // metal ion binding // inferred…	chr9:137533804-137734754 (+) // 87.76 // q34.3
203477_at	COL15A1	1306	0001525 // angiogenesis // inferred from electronic annotation///0007155 // cell adhesion // inferred by curator///0007165 // signal transduction // non-traceable author statement///0007275 // multicellular organismal development // inferred from electronic annotation///0022617 // extracellular matrix disassembly // traceable author statement///0030154 // cell differentiation // inferred from ele…	0005576 // extracellular region // traceable author statement///0005578 // proteinaceous extracellular matrix // inferred from electronic annotation///0005581 // collagen trimer // inferred from electronic annotation///0005582 // collagen type XV trimer // traceable author statement///0005604 // basement membrane // inferred from electronic annotation///0005615 // extracellular space // inferred …	0005198 // structural molecule activity // inferred from electronic annotation///0005201 // extracellular matrix structural constituent // inferred by curator	chr9:101706254-101833072 (+) // 99.75 // q22.33
204136_at	COL7A1	1294	0006888 // ER to Golgi vesicle-mediated transport // traceable author statement///0007155 // cell adhesion // inferred from electronic annotation///0008544 // epidermis development // traceable author statement///0010466 // negative regulation of peptidase activity // inferred from electronic annotation///0010951 // negative regulation of endopeptidase activity // inferred from electronic annotat…	0000139 // Golgi membrane // traceable author statement///0005576 // extracellular region // traceable author statement///0005578 // proteinaceous extracellular matrix // inferred from electronic annotation///0005581 // collagen trimer // inferred from electronic annotation///0005590 // collagen type VII trimer // traceable author statement///0005604 // basement membrane // inferred from electron…	0004867 // serine-type endopeptidase inhibitor activity // inferred from electronic annotation///0005515 // protein binding // inferred from physical interaction///0030414 // peptidase inhibitor activity // inferred from electronic annotation///0042802 // identical protein binding // inferred from electronic annotation	chr3:48601505-48632700 (-) // 99.76 // p21.31
204320_at	COL11A1	1301	0001502 // cartilage condensation // inferred from electronic annotation///0001503 // ossification // inferred from electronic annotation///0002063 // chondrocyte development // inferred from electronic annotation///0003007 // heart morphogenesis // inferred from electronic annotation///0006029 // proteoglycan metabolic process // inferred from electronic annotation///0007601 // visual perception…	0005576 // extracellular region // traceable author statement///0005578 // proteinaceous extracellular matrix // inferred from electronic annotation///0005581 // collagen trimer // inferred from electronic annotation///0005592 // collagen type XI trimer // inferred from direct assay///0005592 // collagen type XI trimer // non-traceable author statement///0005788 // endoplasmic reticulum lumen // …	0005201 // extracellular matrix structural constituent // non-traceable author statement///0030674 // protein binding, bridging // non-traceable author statement///0046872 // metal ion binding // inferred from electronic annotation///0050840 // extracellular matrix binding // non-traceable author statement	chr1:103343014-103573895 (-) // 98.98 // p21.1
204345_at	COL16A1	1307	0007155 // cell adhesion // inferred from direct assay///0007229 // integrin-mediated signaling pathway // traceable author statement///0007565 // female pregnancy // traceable author statement///0022617 // extracellular matrix disassembly // traceable author statement///0030198 // extracellular matrix organization // traceable author statement///0030574 // collagen catabolic process // traceable…	0005576 // extracellular region // traceable author statement///0005578 // proteinaceous extracellular matrix // inferred from electronic annotation///0005581 // collagen trimer // inferred from electronic annotation///0005597 // collagen type XVI trimer // traceable author statement///0005788 // endoplasmic reticulum lumen // traceable author statement	0005178 // integrin binding // inferred from direct assay///0005515 // protein binding // inferred from physical interaction	chr1:32117847-32169556 (-) // 96.01 // p35.2
204636_at	COL17A1	1308	0007160 // cell-matrix adhesion // traceable author statement///0008544 // epidermis development // traceable author statement///0022617 // extracellular matrix disassembly // traceable author statement///0030198 // extracellular matrix organization // traceable author statement///0030574 // collagen catabolic process // traceable author statement///0031581 // hemidesmosome assembly // inferred f…	0005576 // extracellular region // traceable author statement///0005578 // proteinaceous extracellular matrix // inferred from electronic annotation///0005581 // collagen trimer // inferred from electronic annotation///0005604 // basement membrane // inferred from electronic annotation///0005788 // endoplasmic reticulum lumen // traceable author statement///0005886 // plasma membrane // traceable…	0005515 // protein binding // inferred from physical interaction	chr10:105791922-105845571 (-) // 98.61 // q24.33
204724_s_at	COL9A3	1299	0007411 // axon guidance // traceable author statement///0008584 // male gonad development // inferred from electronic annotation///0008585 // female gonad development // inferred from electronic annotation///0022617 // extracellular matrix disassembly // traceable author statement///0030198 // extracellular matrix organization // traceable author statement///0030574 // collagen catabolic process…	0005576 // extracellular region // traceable author statement///0005578 // proteinaceous extracellular matrix // inferred from electronic annotation///0005581 // collagen trimer // inferred from electronic annotation///0005594 // collagen type IX trimer // inferred from direct assay///0005788 // endoplasmic reticulum lumen // traceable author statement	0030020 // extracellular matrix structural constituent conferring tensile strength // inferred by curator	chr20:61448416-61472509 (+) // 97.9 // q13.33
205941_s_at	COL10A1	1300	0001501 // skeletal system development // traceable author statement///0001958 // endochondral ossification // inferred from electronic annotation///0022617 // extracellular matrix disassembly // traceable author statement///0030198 // extracellular matrix organization // traceable author statement///0030574 // collagen catabolic process // traceable author statement///0051216 // cartilage develo…	0005576 // extracellular region // traceable author statement///0005578 // proteinaceous extracellular matrix // inferred from electronic annotation///0005581 // collagen trimer // inferred from electronic annotation///0005788 // endoplasmic reticulum lumen // traceable author statement///0005938 // cell cortex // inferred from electronic annotation	0005515 // protein binding // inferred from physical interaction///0046872 // metal ion binding // inferred from electronic annotation	chr6:116440120-116447063 (-) // 97.37 // q22.1
208096_s_at	COL21A1	81578	0030198 // extracellular matrix organization // traceable author statement	0005576 // extracellular region // traceable author statement///0005578 // proteinaceous extracellular matrix // inferred from electronic annotation///0005581 // collagen trimer // inferred from electronic annotation///0005737 // cytoplasm // inferred from electronic annotation///0005788 // endoplasmic reticulum lumen // traceable author statement///0031012 // extracellular matrix // inferred fro…		chr6:55921388-56112385 (-) // 99.38 // p12.1
208535_x_at	COL13A1	1305	0001503 // ossification // inferred from electronic annotation///0001763 // morphogenesis of a branching structure // inferred from sequence or structural similarity///0001958 // endochondral ossification // inferred from sequence or structural similarity///0007155 // cell adhesion // inferred from electronic annotation///0007160 // cell-matrix adhesion // inferred from physical interaction///000…	0005576 // extracellular region // traceable author statement///0005581 // collagen trimer // inferred from electronic annotation///0005600 // collagen type XIII trimer // traceable author statement///0005788 // endoplasmic reticulum lumen // traceable author statement///0005886 // plasma membrane // traceable author statement///0005911 // cell-cell junction // inferred from electronic annotation…	0005515 // protein binding // inferred from physical interaction///0008201 // heparin binding // inferred from direct assay	chr10:71562168-71712725 (+) // 94.65 // q22.1
209081_s_at	COL18A1	80781	0001525 // angiogenesis // inferred from electronic annotation///0001886 // endothelial cell morphogenesis // inferred from electronic annotation///0007155 // cell adhesion // inferred from electronic annotation///0007601 // visual perception // traceable author statement///0008284 // positive regulation of cell proliferation // inferred from electronic annotation///0008285 // negative regulation…	0005576 // extracellular region // traceable author statement///0005578 // proteinaceous extracellular matrix // inferred from electronic annotation///0005581 // collagen trimer // inferred from electronic annotation///0005604 // basement membrane // inferred from electronic annotation///0005615 // extracellular space // inferred from direct assay///0005788 // endoplasmic reticulum lumen // trace…	0005198 // structural molecule activity // inferred from electronic annotation///0005515 // protein binding // inferred from physical interaction///0042802 // identical protein binding // inferred from physical interaction///0046872 // metal ion binding // inferred from electronic annotation	chr21:46875401-46934587 (+) // 98.57 // q22.3
209082_s_at	COL18A1	80781	0001525 // angiogenesis // inferred from electronic annotation///0001886 // endothelial cell morphogenesis // inferred from electronic annotation///0007155 // cell adhesion // inferred from electronic annotation///0007601 // visual perception // traceable author statement///0008284 // positive regulation of cell proliferation // inferred from electronic annotation///0008285 // negative regulation…	0005576 // extracellular region // traceable author statement///0005578 // proteinaceous extracellular matrix // inferred from electronic annotation///0005581 // collagen trimer // inferred from electronic annotation///0005604 // basement membrane // inferred from electronic annotation///0005615 // extracellular space // inferred from direct assay///0005788 // endoplasmic reticulum lumen // trace…	0005198 // structural molecule activity // inferred from electronic annotation///0005515 // protein binding // inferred from physical interaction///0042802 // identical protein binding // inferred from physical interaction///0046872 // metal ion binding // inferred from electronic annotation	chr21:46875402-46933633 (+) // 97.99 // q22.3
209156_s_at	COL6A2	1292	0007155 // cell adhesion // inferred from electronic annotation///0007411 // axon guidance // traceable author statement///0009749 // response to glucose // inferred from electronic annotation///0022617 // extracellular matrix disassembly // traceable author statement///0030198 // extracellular matrix organization // traceable author statement///0030574 // collagen catabolic process // traceable …	0005576 // extracellular region // inferred from direct assay///0005576 // extracellular region // traceable author statement///0005578 // proteinaceous extracellular matrix // inferred from electronic annotation///0005581 // collagen trimer // inferred from electronic annotation///0005615 // extracellular space // inferred from direct assay///0005788 // endoplasmic reticulum lumen // traceable a…	0005515 // protein binding // inferred from physical interaction	chr21:47531369-47552761 (+) // 98.76 // q22.3
210945_at	COL4A6	1288	0007155 // cell adhesion // inferred from electronic annotation///0022617 // extracellular matrix disassembly // traceable author statement///0030198 // extracellular matrix organization // traceable author statement///0030574 // collagen catabolic process // traceable author statement	0005576 // extracellular region // traceable author statement///0005578 // proteinaceous extracellular matrix // inferred from electronic annotation///0005581 // collagen trimer // inferred from electronic annotation///0005587 // collagen type IV trimer // non-traceable author statement///0005604 // basement membrane // inferred from electronic annotation///0005788 // endoplasmic reticulum lumen …	0005201 // extracellular matrix structural constituent // inferred from electronic annotation	chrX:107510877-107682727 (-) // 56.38 // q22.3
211011_at	COL19A1	1310	0001501 // skeletal system development // traceable author statement///0007155 // cell adhesion // non-traceable author statement///0007275 // multicellular organismal development // inferred from electronic annotation///0007517 // muscle organ development // inferred from electronic annotation///0007519 // skeletal muscle tissue development // inferred from electronic annotation///0016337 // sin…	0005576 // extracellular region // traceable author statement///0005578 // proteinaceous extracellular matrix // non-traceable author statement///0005581 // collagen trimer // non-traceable author statement///0005788 // endoplasmic reticulum lumen // traceable author statement	0005201 // extracellular matrix structural constituent // non-traceable author statement///0030674 // protein binding, bridging // non-traceable author statement	chr6:70576447-70917153 (+) // 98.55 // q13
211161_s_at	COL3A1	1281	0001501 // skeletal system development // inferred from electronic annotation///0001568 // blood vessel development // inferred from electronic annotation///0006898 // receptor-mediated endocytosis // traceable author statement///0007160 // cell-matrix adhesion // inferred from direct assay///0007179 // transforming growth factor beta receptor signaling pathway // inferred from direct assay///000…	0005576 // extracellular region // traceable author statement///0005578 // proteinaceous extracellular matrix // inferred from electronic annotation///0005581 // collagen trimer // inferred from electronic annotation///0005586 // collagen type III trimer // inferred from mutant phenotype///0005586 // collagen type III trimer // non-traceable author statement///0005615 // extracellular space // in…	0005178 // integrin binding // inferred from mutant phenotype///0005178 // integrin binding // non-traceable author statement///0005201 // extracellular matrix structural constituent // inferred from mutant phenotype///0005515 // protein binding // inferred from physical interaction///0046332 // SMAD binding // inferred from electronic annotation///0046872 // metal ion binding // inferred from el…
211343_s_at	COL13A1	1305	0001503 // ossification // inferred from electronic annotation///0001763 // morphogenesis of a branching structure // inferred from sequence or structural similarity///0001958 // endochondral ossification // inferred from sequence or structural similarity///0007155 // cell adhesion // inferred from electronic annotation///0007160 // cell-matrix adhesion // inferred from physical interaction///000…	0005576 // extracellular region // traceable author statement///0005581 // collagen trimer // inferred from electronic annotation///0005600 // collagen type XIII trimer // traceable author statement///0005788 // endoplasmic reticulum lumen // traceable author statement///0005886 // plasma membrane // traceable author statement///0005911 // cell-cell junction // inferred from electronic annotation…	0005515 // protein binding // inferred from physical interaction///0008201 // heparin binding // inferred from direct assay	chr10:71689796-71718771 (+) // 90.72 // q22.1
211473_s_at	COL4A6	1288	0007155 // cell adhesion // inferred from electronic annotation///0022617 // extracellular matrix disassembly // traceable author statement///0030198 // extracellular matrix organization // traceable author statement///0030574 // collagen catabolic process // traceable author statement///0071230 // cellular response to amino acid stimulus // inferred from electronic annotation	0005576 // extracellular region // traceable author statement///0005578 // proteinaceous extracellular matrix // inferred from electronic annotation///0005581 // collagen trimer // inferred from electronic annotation///0005587 // collagen type IV trimer // non-traceable author statement///0005604 // basement membrane // inferred from electronic annotation///0005788 // endoplasmic reticulum lumen …	0005198 // structural molecule activity // inferred from electronic annotation///0005201 // extracellular matrix structural constituent // inferred from electronic annotation	chrX:107399685-107682702 (-) // 99.15 // q22.3
211809_x_at	COL13A1	1305	0001503 // ossification // inferred from electronic annotation///0001763 // morphogenesis of a branching structure // inferred from sequence or structural similarity///0001958 // endochondral ossification // inferred from sequence or structural similarity///0007155 // cell adhesion // inferred from electronic annotation///0007160 // cell-matrix adhesion // inferred from physical interaction///000…	0005576 // extracellular region // traceable author statement///0005581 // collagen trimer // inferred from electronic annotation///0005600 // collagen type XIII trimer // traceable author statement///0005788 // endoplasmic reticulum lumen // traceable author statement///0005886 // plasma membrane // traceable author statement///0005911 // cell-cell junction // inferred from electronic annotation…	0005515 // protein binding // inferred from physical interaction///0008201 // heparin binding // inferred from direct assay	chr10:71562307-71716798 (+) // 98.47 // q22.1
211964_at	COL4A2	1284	0001525 // angiogenesis // inferred from electronic annotation///0006351 // transcription, DNA-templated // inferred from electronic annotation///0006898 // receptor-mediated endocytosis // traceable author statement///0007411 // axon guidance // traceable author statement///0016525 // negative regulation of angiogenesis // inferred from direct assay///0022617 // extracellular matrix disassembly …	0005576 // extracellular region // traceable author statement///0005578 // proteinaceous extracellular matrix // inferred from electronic annotation///0005581 // collagen trimer // inferred from electronic annotation///0005587 // collagen type IV trimer // traceable author statement///0005604 // basement membrane // inferred from electronic annotation///0005788 // endoplasmic reticulum lumen // t…	0005201 // extracellular matrix structural constituent // traceable author statement///0005515 // protein binding // inferred from physical interaction	chr13:111125275-111165374 (+) // 92.16 // q34
211966_at	COL4A2	1284	0001525 // angiogenesis // inferred from electronic annotation///0006351 // transcription, DNA-templated // inferred from electronic annotation///0006898 // receptor-mediated endocytosis // traceable author statement///0007411 // axon guidance // traceable author statement///0016525 // negative regulation of angiogenesis // inferred from direct assay///0022617 // extracellular matrix disassembly …	0005576 // extracellular region // traceable author statement///0005578 // proteinaceous extracellular matrix // inferred from electronic annotation///0005581 // collagen trimer // inferred from electronic annotation///0005587 // collagen type IV trimer // traceable author statement///0005604 // basement membrane // inferred from electronic annotation///0005788 // endoplasmic reticulum lumen // t…	0005201 // extracellular matrix structural constituent // traceable author statement///0005515 // protein binding // inferred from physical interaction	chr13:111125275-111165374 (+) // 92.16 // q34
211980_at	COL4A1	1282	0001525 // angiogenesis // inferred from electronic annotation///0001569 // patterning of blood vessels // inferred from mutant phenotype///0006898 // receptor-mediated endocytosis // traceable author statement///0007411 // axon guidance // traceable author statement///0007420 // brain development // inferred from mutant phenotype///0007528 // neuromuscular junction development // inferred from e…	0005576 // extracellular region // non-traceable author statement///0005576 // extracellular region // traceable author statement///0005578 // proteinaceous extracellular matrix // inferred from electronic annotation///0005581 // collagen trimer // inferred from electronic annotation///0005587 // collagen type IV trimer // inferred from mutant phenotype///0005604 // basement membrane // inferred …	0005201 // extracellular matrix structural constituent // inferred from mutant phenotype///0005515 // protein binding // inferred from physical interaction///0030023 // extracellular matrix constituent conferring elasticity // inferred by curator///0048407 // platelet-derived growth factor binding // inferred from direct assay	chr13:110801314-110959374 (-) // 99.05 // q34
211981_at	COL4A1	1282	0001525 // angiogenesis // inferred from electronic annotation///0001569 // patterning of blood vessels // inferred from mutant phenotype///0006898 // receptor-mediated endocytosis // traceable author statement///0007411 // axon guidance // traceable author statement///0007420 // brain development // inferred from mutant phenotype///0007528 // neuromuscular junction development // inferred from e…	0005576 // extracellular region // non-traceable author statement///0005576 // extracellular region // traceable author statement///0005578 // proteinaceous extracellular matrix // inferred from electronic annotation///0005581 // collagen trimer // inferred from electronic annotation///0005587 // collagen type IV trimer // inferred from mutant phenotype///0005604 // basement membrane // inferred …	0005201 // extracellular matrix structural constituent // inferred from mutant phenotype///0005515 // protein binding // inferred from physical interaction///0030023 // extracellular matrix constituent conferring elasticity // inferred by curator///0048407 // platelet-derived growth factor binding // inferred from direct assay	chr13:110801314-110959374 (-) // 99.05 // q34
212091_s_at	COL6A1	1291	0001649 // osteoblast differentiation // inferred from direct assay///0007155 // cell adhesion // inferred from electronic annotation///0007411 // axon guidance // traceable author statement///0022617 // extracellular matrix disassembly // traceable author statement///0030198 // extracellular matrix organization // traceable author statement///0030574 // collagen catabolic process // traceable au…	0005576 // extracellular region // inferred from direct assay///0005576 // extracellular region // traceable author statement///0005578 // proteinaceous extracellular matrix // inferred from electronic annotation///0005581 // collagen trimer // inferred from electronic annotation///0005589 // collagen type VI trimer // non-traceable author statement///0005765 // lysosomal membrane // inferred fro…	0048407 // platelet-derived growth factor binding // inferred from direct assay	chr21:47420244-47424962 (+) // 98.24 // q22.3
212488_at	COL5A1	1289	0001568 // blood vessel development // inferred from electronic annotation///0003007 // heart morphogenesis // inferred from electronic annotation///0007155 // cell adhesion // inferred from mutant phenotype///0007411 // axon guidance // traceable author statement///0016477 // cell migration // inferred from mutant phenotype///0022617 // extracellular matrix disassembly // traceable author statem…	0005576 // extracellular region // traceable author statement///0005578 // proteinaceous extracellular matrix // inferred from electronic annotation///0005581 // collagen trimer // inferred from electronic annotation///0005588 // collagen type V trimer // inferred from mutant phenotype///0005604 // basement membrane // inferred from electronic annotation///0005788 // endoplasmic reticulum lumen /…	0005178 // integrin binding // non-traceable author statement///0005201 // extracellular matrix structural constituent // inferred from electronic annotation///0005515 // protein binding // inferred from electronic annotation///0008201 // heparin binding // inferred from direct assay///0043394 // proteoglycan binding // inferred from physical interaction///0046872 // metal ion binding // inferred…	chr9:137734331-137736688 (+) // 99.36 // q34.3
212489_at	COL5A1	1289	0001568 // blood vessel development // inferred from electronic annotation///0003007 // heart morphogenesis // inferred from electronic annotation///0007155 // cell adhesion // inferred from mutant phenotype///0007411 // axon guidance // traceable author statement///0016477 // cell migration // inferred from mutant phenotype///0022617 // extracellular matrix disassembly // traceable author statem…	0005576 // extracellular region // traceable author statement///0005578 // proteinaceous extracellular matrix // inferred from electronic annotation///0005581 // collagen trimer // inferred from electronic annotation///0005588 // collagen type V trimer // inferred from mutant phenotype///0005604 // basement membrane // inferred from electronic annotation///0005788 // endoplasmic reticulum lumen /…	0005178 // integrin binding // non-traceable author statement///0005201 // extracellular matrix structural constituent // inferred from electronic annotation///0005515 // protein binding // inferred from electronic annotation///0008201 // heparin binding // inferred from direct assay///0043394 // proteoglycan binding // inferred from physical interaction///0046872 // metal ion binding // inferred…	chr9:137734331-137736688 (+) // 99.36 // q34.3
212865_s_at	COL14A1	7373	0003229 // ventricular cardiac muscle tissue development // inferred from electronic annotation///0007155 // cell adhesion // inferred from electronic annotation///0016337 // single organismal cell-cell adhesion // non-traceable author statement///0022617 // extracellular matrix disassembly // traceable author statement///0030198 // extracellular matrix organization // non-traceable author statem…	0005576 // extracellular region // traceable author statement///0005578 // proteinaceous extracellular matrix // non-traceable author statement///0005581 // collagen trimer // non-traceable author statement///0005596 // collagen type XIV trimer // non-traceable author statement///0005614 // interstitial matrix // inferred from electronic annotation///0005615 // extracellular space // inferred fro…	0005201 // extracellular matrix structural constituent // non-traceable author statement///0005515 // protein binding // inferred from electronic annotation///0005518 // collagen binding // non-traceable author statement///0030674 // protein binding, bridging // non-traceable author statement///0044822 // poly(A) RNA binding // inferred from direct assay	chr8:121267478-121384277 (+) // 94.28 // q24.12
212937_s_at	COL6A1	1291	0001649 // osteoblast differentiation // inferred from direct assay///0007155 // cell adhesion // inferred from electronic annotation///0007411 // axon guidance // traceable author statement///0022617 // extracellular matrix disassembly // traceable author statement///0030198 // extracellular matrix organization // traceable author statement///0030574 // collagen catabolic process // traceable au…	0005576 // extracellular region // inferred from direct assay///0005576 // extracellular region // traceable author statement///0005578 // proteinaceous extracellular matrix // inferred from electronic annotation///0005581 // collagen trimer // inferred from electronic annotation///0005589 // collagen type VI trimer // non-traceable author statement///0005765 // lysosomal membrane // inferred fro…	0048407 // platelet-derived growth factor binding // inferred from direct assay	chr21:47401650-47420281 (+) // 98.57 // q22.3
212938_at	COL6A1	1291	0001649 // osteoblast differentiation // inferred from direct assay///0007155 // cell adhesion // inferred from electronic annotation///0007411 // axon guidance // traceable author statement///0022617 // extracellular matrix disassembly // traceable author statement///0030198 // extracellular matrix organization // traceable author statement///0030574 // collagen catabolic process // traceable au…	0005576 // extracellular region // inferred from direct assay///0005576 // extracellular region // traceable author statement///0005578 // proteinaceous extracellular matrix // inferred from electronic annotation///0005581 // collagen trimer // inferred from electronic annotation///0005589 // collagen type VI trimer // non-traceable author statement///0005765 // lysosomal membrane // inferred fro…	0048407 // platelet-derived growth factor binding // inferred from direct assay	chr21:47401650-47420281 (+) // 98.57 // q22.3
212939_at	COL6A1	1291	0001649 // osteoblast differentiation // inferred from direct assay///0007155 // cell adhesion // inferred from electronic annotation///0007411 // axon guidance // traceable author statement///0022617 // extracellular matrix disassembly // traceable author statement///0030198 // extracellular matrix organization // traceable author statement///0030574 // collagen catabolic process // traceable au…	0005576 // extracellular region // inferred from direct assay///0005576 // extracellular region // traceable author statement///0005578 // proteinaceous extracellular matrix // inferred from electronic annotation///0005581 // collagen trimer // inferred from electronic annotation///0005589 // collagen type VI trimer // non-traceable author statement///0005765 // lysosomal membrane // inferred fro…	0048407 // platelet-derived growth factor binding // inferred from direct assay	chr21:47401650-47420281 (-) // 98.57 // q22.3
212940_at	COL6A1	1291	0001649 // osteoblast differentiation // inferred from direct assay///0007155 // cell adhesion // inferred from electronic annotation///0007411 // axon guidance // traceable author statement///0022617 // extracellular matrix disassembly // traceable author statement///0030198 // extracellular matrix organization // traceable author statement///0030574 // collagen catabolic process // traceable au…	0005576 // extracellular region // inferred from direct assay///0005576 // extracellular region // traceable author statement///0005578 // proteinaceous extracellular matrix // inferred from electronic annotation///0005581 // collagen trimer // inferred from electronic annotation///0005589 // collagen type VI trimer // non-traceable author statement///0005765 // lysosomal membrane // inferred fro…	0048407 // platelet-derived growth factor binding // inferred from direct assay	chr21:47401650-47420281 (+) // 98.57 // q22.3
213110_s_at	COL4A5	1287	0007411 // axon guidance // traceable author statement///0007528 // neuromuscular junction development // inferred from electronic annotation///0022617 // extracellular matrix disassembly // traceable author statement///0030198 // extracellular matrix organization // traceable author statement///0030574 // collagen catabolic process // traceable author statement	0005576 // extracellular region // traceable author statement///0005578 // proteinaceous extracellular matrix // inferred from electronic annotation///0005581 // collagen trimer // inferred from electronic annotation///0005587 // collagen type IV trimer // inferred from electronic annotation///0005604 // basement membrane // inferred from electronic annotation///0005605 // basal lamina // inferre…	0005201 // extracellular matrix structural constituent // inferred from electronic annotation	chrX:107683355-107940774 (+) // 97.87 // q22.3
213290_at	COL6A2	1292	0007155 // cell adhesion // inferred from electronic annotation///0007411 // axon guidance // traceable author statement///0009749 // response to glucose // inferred from electronic annotation///0022617 // extracellular matrix disassembly // traceable author statement///0030198 // extracellular matrix organization // traceable author statement///0030574 // collagen catabolic process // traceable …	0005576 // extracellular region // inferred from direct assay///0005576 // extracellular region // traceable author statement///0005578 // proteinaceous extracellular matrix // inferred from electronic annotation///0005581 // collagen trimer // inferred from electronic annotation///0005615 // extracellular space // inferred from direct assay///0005788 // endoplasmic reticulum lumen // traceable a…	0005515 // protein binding // inferred from physical interaction	chr21:47542409-47714692 (+) // 92.51 // q22.3
213428_s_at	COL6A1	1291	0001649 // osteoblast differentiation // inferred from direct assay///0007155 // cell adhesion // inferred from electronic annotation///0007411 // axon guidance // traceable author statement///0022617 // extracellular matrix disassembly // traceable author statement///0030198 // extracellular matrix organization // traceable author statement///0030574 // collagen catabolic process // traceable au…	0005576 // extracellular region // inferred from direct assay///0005576 // extracellular region // traceable author statement///0005578 // proteinaceous extracellular matrix // inferred from electronic annotation///0005581 // collagen trimer // inferred from electronic annotation///0005589 // collagen type VI trimer // non-traceable author statement///0005765 // lysosomal membrane // inferred fro…	0048407 // platelet-derived growth factor binding // inferred from direct assay	chr21:47424488-47424962 (+) // 74.29 // q22.3
213492_at	COL2A1	1280	0001501 // skeletal system development // inferred from mutant phenotype///0001502 // cartilage condensation // inferred from electronic annotation///0001503 // ossification // inferred from electronic annotation///0001894 // tissue homeostasis // inferred from electronic annotation///0001958 // endochondral ossification // inferred from electronic annotation///0002062 // chondrocyte differentiat…	0005576 // extracellular region // traceable author statement///0005578 // proteinaceous extracellular matrix // inferred from electronic annotation///0005581 // collagen trimer // inferred from electronic annotation///0005585 // collagen type II trimer // inferred from direct assay///0005604 // basement membrane // inferred from electronic annotation///0005615 // extracellular space // inferred …	0005201 // extracellular matrix structural constituent // inferred from electronic annotation///0005515 // protein binding // inferred from electronic annotation///0030020 // extracellular matrix structural constituent conferring tensile strength // inferred by curator///0042802 // identical protein binding // non-traceable author statement///0046872 // metal ion binding // inferred from electron…	chr12:48366749-48398104 (-) // 97.95 // q13.11
213622_at	COL9A2	1298	0001501 // skeletal system development // traceable author statement///0007411 // axon guidance // traceable author statement///0022617 // extracellular matrix disassembly // traceable author statement///0030198 // extracellular matrix organization // traceable author statement///0030574 // collagen catabolic process // traceable author statement	0005576 // extracellular region // traceable author statement///0005578 // proteinaceous extracellular matrix // inferred from electronic annotation///0005581 // collagen trimer // inferred from electronic annotation///0005594 // collagen type IX trimer // inferred from direct assay///0005788 // endoplasmic reticulum lumen // traceable author statement	0030020 // extracellular matrix structural constituent conferring tensile strength // inferred by curator	chr1:40766192-40782939 (-) // 97.19 // p34.2
213870_at	COL11A2	1302	0001501 // skeletal system development // inferred from mutant phenotype///0001501 // skeletal system development // non-traceable author statement///0001503 // ossification // inferred from electronic annotation///0001894 // tissue homeostasis // inferred from electronic annotation///0002062 // chondrocyte differentiation // inferred from electronic annotation///0007605 // sensory perception of …	0005576 // extracellular region // traceable author statement///0005578 // proteinaceous extracellular matrix // inferred from electronic annotation///0005581 // collagen trimer // inferred from electronic annotation///0005592 // collagen type XI trimer // non-traceable author statement///0005788 // endoplasmic reticulum lumen // traceable author statement///0005840 // ribosome // inferred from e…	0005201 // extracellular matrix structural constituent // inferred from electronic annotation///0005515 // protein binding // inferred from physical interaction///0030020 // extracellular matrix structural constituent conferring tensile strength // non-traceable author statement///0030674 // protein binding, bridging // non-traceable author statement///0046872 // metal ion binding // inferred fro…	chr6:33130470-33160243 (-) // 96.71 // p21.32
213992_at	COL4A6	1288	0007155 // cell adhesion // inferred from electronic annotation///0022617 // extracellular matrix disassembly // traceable author statement///0030198 // extracellular matrix organization // traceable author statement///0030574 // collagen catabolic process // traceable author statement///0071230 // cellular response to amino acid stimulus // inferred from electronic annotation	0005576 // extracellular region // traceable author statement///0005578 // proteinaceous extracellular matrix // inferred from electronic annotation///0005581 // collagen trimer // inferred from electronic annotation///0005587 // collagen type IV trimer // non-traceable author statement///0005604 // basement membrane // inferred from electronic annotation///0005788 // endoplasmic reticulum lumen …	0005198 // structural molecule activity // inferred from electronic annotation///0005201 // extracellular matrix structural constituent // inferred from electronic annotation	chrX:107398837-107681660 (-) // 99.31 // q22.3
214200_s_at	COL6A1	1291	0001649 // osteoblast differentiation // inferred from direct assay///0007155 // cell adhesion // inferred from electronic annotation///0007411 // axon guidance // traceable author statement///0022617 // extracellular matrix disassembly // traceable author statement///0030198 // extracellular matrix organization // traceable author statement///0030574 // collagen catabolic process // traceable au…	0005576 // extracellular region // inferred from direct assay///0005576 // extracellular region // traceable author statement///0005589 // collagen type VI trimer // non-traceable author statement///0005765 // lysosomal membrane // inferred from direct assay///0005788 // endoplasmic reticulum lumen // traceable author statement///0016020 // membrane // inferred from direct assay///0031012 // extr…	0048407 // platelet-derived growth factor binding // inferred from direct assay	chr21:47404278-47409693 (-) // 91.57 // q22.3
214587_at	COL8A1	1295	0001525 // angiogenesis // inferred from electronic annotation///0007155 // cell adhesion // inferred from electronic annotation///0010811 // positive regulation of cell-substrate adhesion // inferred from electronic annotation///0022617 // extracellular matrix disassembly // traceable author statement///0030198 // extracellular matrix organization // traceable author statement///0030574 // colla…	0005576 // extracellular region // traceable author statement///0005578 // proteinaceous extracellular matrix // inferred from electronic annotation///0005581 // collagen trimer // inferred from electronic annotation///0005591 // collagen type VIII trimer // traceable author statement///0005604 // basement membrane // inferred from electronic annotation///0005788 // endoplasmic reticulum lumen //…	0005515 // protein binding // inferred from physical interaction	chr3:99357457-99516199 (+) // 94.98 // q12.1
214602_at	COL4A4	1286	0007411 // axon guidance // traceable author statement///0022617 // extracellular matrix disassembly // traceable author statement///0030198 // extracellular matrix organization // traceable author statement///0030574 // collagen catabolic process // traceable author statement///0032836 // glomerular basement membrane development // inferred from mutant phenotype	0005576 // extracellular region // traceable author statement///0005578 // proteinaceous extracellular matrix // inferred from electronic annotation///0005581 // collagen trimer // inferred from electronic annotation///0005587 // collagen type IV trimer // inferred from direct assay///0005604 // basement membrane // inferred from electronic annotation///0005605 // basal lamina // inferred from di…	0005201 // extracellular matrix structural constituent // inferred from mutant phenotype	chr2:227869905-228028829 (-) // 99.62 // q36.3
214641_at	COL4A3	1285	0006919 // activation of cysteine-type endopeptidase activity involved in apoptotic process // inferred from direct assay///0007155 // cell adhesion // inferred from electronic annotation///0007166 // cell surface receptor signaling pathway // non-traceable author statement///0007411 // axon guidance // traceable author statement///0007605 // sensory perception of sound // traceable author statem…	0005576 // extracellular region // traceable author statement///0005578 // proteinaceous extracellular matrix // inferred from electronic annotation///0005581 // collagen trimer // inferred from electronic annotation///0005587 // collagen type IV trimer // inferred from direct assay///0005604 // basement membrane // inferred from direct assay///0005783 // endoplasmic reticulum // inferred from di…	0005178 // integrin binding // inferred from direct assay///0005178 // integrin binding // traceable author statement///0005198 // structural molecule activity // non-traceable author statement///0005201 // extracellular matrix structural constituent // inferred from electronic annotation///0005515 // protein binding // inferred from physical interaction///0008191 // metalloendopeptidase inhibito…	chr2:228029280-228177263 (+) // 99.04 // q36.3
215076_s_at	COL3A1	1281	0001501 // skeletal system development // inferred from electronic annotation///0001568 // blood vessel development // inferred from electronic annotation///0006898 // receptor-mediated endocytosis // traceable author statement///0007160 // cell-matrix adhesion // inferred from direct assay///0007179 // transforming growth factor beta receptor signaling pathway // inferred from direct assay///000…	0005576 // extracellular region // traceable author statement///0005578 // proteinaceous extracellular matrix // inferred from electronic annotation///0005581 // collagen trimer // inferred from electronic annotation///0005586 // collagen type III trimer // inferred from mutant phenotype///0005586 // collagen type III trimer // non-traceable author statement///0005615 // extracellular space // in…	0005178 // integrin binding // inferred from mutant phenotype///0005178 // integrin binding // non-traceable author statement///0005201 // extracellular matrix structural constituent // inferred from mutant phenotype///0005515 // protein binding // inferred from physical interaction///0046332 // SMAD binding // inferred from electronic annotation///0046872 // metal ion binding // inferred from el…	chr2:189874343-189876525 (+) // 96.9 // q32.2
216367_at	COL4A3	1285	0006919 // activation of cysteine-type endopeptidase activity involved in apoptotic process // inferred from direct assay///0007155 // cell adhesion // inferred from electronic annotation///0007166 // cell surface receptor signaling pathway // non-traceable author statement///0007411 // axon guidance // traceable author statement///0007605 // sensory perception of sound // traceable author statem…	0005576 // extracellular region // traceable author statement///0005578 // proteinaceous extracellular matrix // inferred from electronic annotation///0005581 // collagen trimer // inferred from electronic annotation///0005587 // collagen type IV trimer // inferred from direct assay///0005604 // basement membrane // inferred from direct assay///0005783 // endoplasmic reticulum // inferred from di…	0005178 // integrin binding // inferred from direct assay///0005178 // integrin binding // traceable author statement///0005198 // structural molecule activity // non-traceable author statement///0005201 // extracellular matrix structural constituent // inferred from electronic annotation///0005515 // protein binding // inferred from physical interaction///0008191 // metalloendopeptidase inhibito…	chr2:228172487-228176586 (-) // 100.0 // q36.3
216368_s_at	COL4A3	1285	0006919 // activation of cysteine-type endopeptidase activity involved in apoptotic process // inferred from direct assay///0007155 // cell adhesion // inferred from electronic annotation///0007166 // cell surface receptor signaling pathway // non-traceable author statement///0007411 // axon guidance // traceable author statement///0007605 // sensory perception of sound // traceable author statem…	0005576 // extracellular region // traceable author statement///0005578 // proteinaceous extracellular matrix // inferred from electronic annotation///0005581 // collagen trimer // inferred from electronic annotation///0005587 // collagen type IV trimer // inferred from direct assay///0005604 // basement membrane // inferred from direct assay///0005783 // endoplasmic reticulum // inferred from di…	0005178 // integrin binding // inferred from direct assay///0005178 // integrin binding // traceable author statement///0005198 // structural molecule activity // non-traceable author statement///0005201 // extracellular matrix structural constituent // inferred from electronic annotation///0005515 // protein binding // inferred from physical interaction///0008191 // metalloendopeptidase inhibito…	chr2:228172487-228176586 (-) // 100.0 // q36.3
216865_at	COL14A1	7373	0003229 // ventricular cardiac muscle tissue development // inferred from electronic annotation///0007155 // cell adhesion // inferred from electronic annotation///0016337 // single organismal cell-cell adhesion // non-traceable author statement///0022617 // extracellular matrix disassembly // traceable author statement///0030198 // extracellular matrix organization // non-traceable author statem…	0005576 // extracellular region // traceable author statement///0005578 // proteinaceous extracellular matrix // non-traceable author statement///0005581 // collagen trimer // non-traceable author statement///0005596 // collagen type XIV trimer // non-traceable author statement///0005614 // interstitial matrix // inferred from electronic annotation///0005615 // extracellular space // inferred fro…	0005201 // extracellular matrix structural constituent // non-traceable author statement///0005515 // protein binding // inferred from electronic annotation///0005518 // collagen binding // non-traceable author statement///0030674 // protein binding, bridging // non-traceable author statement///0044822 // poly(A) RNA binding // inferred from direct assay	chr8:121209154-121279230 (+) // 99.32 // q24.12
216866_s_at	COL14A1	7373	0003229 // ventricular cardiac muscle tissue development // inferred from electronic annotation///0007155 // cell adhesion // inferred from electronic annotation///0016337 // single organismal cell-cell adhesion // non-traceable author statement///0022617 // extracellular matrix disassembly // traceable author statement///0030198 // extracellular matrix organization // non-traceable author statem…	0005576 // extracellular region // traceable author statement///0005578 // proteinaceous extracellular matrix // non-traceable author statement///0005581 // collagen trimer // non-traceable author statement///0005596 // collagen type XIV trimer // non-traceable author statement///0005614 // interstitial matrix // inferred from electronic annotation///0005615 // extracellular space // inferred fro…	0005201 // extracellular matrix structural constituent // non-traceable author statement///0005515 // protein binding // inferred from electronic annotation///0005518 // collagen binding // non-traceable author statement///0030674 // protein binding, bridging // non-traceable author statement///0044822 // poly(A) RNA binding // inferred from direct assay	chr8:121209154-121279230 (+) // 99.32 // q24.12
216893_s_at	COL4A3	1285	0006919 // activation of cysteine-type endopeptidase activity involved in apoptotic process // inferred from direct assay///0007155 // cell adhesion // inferred from electronic annotation///0007166 // cell surface receptor signaling pathway // non-traceable author statement///0007411 // axon guidance // traceable author statement///0007605 // sensory perception of sound // traceable author statem…	0005576 // extracellular region // traceable author statement///0005578 // proteinaceous extracellular matrix // inferred from electronic annotation///0005581 // collagen trimer // inferred from electronic annotation///0005587 // collagen type IV trimer // inferred from direct assay///0005604 // basement membrane // inferred from direct assay///0005783 // endoplasmic reticulum // inferred from di…	0005178 // integrin binding // inferred from direct assay///0005178 // integrin binding // traceable author statement///0005198 // structural molecule activity // non-traceable author statement///0005201 // extracellular matrix structural constituent // inferred from electronic annotation///0005515 // protein binding // inferred from physical interaction///0008191 // metalloendopeptidase inhibito…	chr2:228172487-228176660 (+) // 99.5 // q36.3
216896_at	COL4A3	1285	0006919 // activation of cysteine-type endopeptidase activity involved in apoptotic process // inferred from direct assay///0007155 // cell adhesion // inferred from electronic annotation///0007166 // cell surface receptor signaling pathway // non-traceable author statement///0007411 // axon guidance // traceable author statement///0007605 // sensory perception of sound // traceable author statem…	0005576 // extracellular region // traceable author statement///0005578 // proteinaceous extracellular matrix // inferred from electronic annotation///0005581 // collagen trimer // inferred from electronic annotation///0005587 // collagen type IV trimer // inferred from direct assay///0005604 // basement membrane // inferred from direct assay///0005783 // endoplasmic reticulum // inferred from di…	0005178 // integrin binding // inferred from direct assay///0005178 // integrin binding // traceable author statement///0005198 // structural molecule activity // non-traceable author statement///0005201 // extracellular matrix structural constituent // inferred from electronic annotation///0005515 // protein binding // inferred from physical interaction///0008191 // metalloendopeptidase inhibito…	chr2:228172487-228176660 (-) // 99.5 // q36.3
216898_s_at	COL4A3	1285	0006919 // activation of cysteine-type endopeptidase activity involved in apoptotic process // inferred from direct assay///0007155 // cell adhesion // inferred from electronic annotation///0007166 // cell surface receptor signaling pathway // non-traceable author statement///0007411 // axon guidance // traceable author statement///0007605 // sensory perception of sound // traceable author statem…	0005576 // extracellular region // traceable author statement///0005578 // proteinaceous extracellular matrix // inferred from electronic annotation///0005581 // collagen trimer // inferred from electronic annotation///0005587 // collagen type IV trimer // inferred from direct assay///0005604 // basement membrane // inferred from direct assay///0005783 // endoplasmic reticulum // inferred from di…	0005178 // integrin binding // inferred from direct assay///0005178 // integrin binding // traceable author statement///0005198 // structural molecule activity // non-traceable author statement///0005201 // extracellular matrix structural constituent // inferred from electronic annotation///0005515 // protein binding // inferred from physical interaction///0008191 // metalloendopeptidase inhibito…	chr2:228172487-228176586 (+) // 100.0 // q36.3
216904_at	COL6A1	1291	0001649 // osteoblast differentiation // inferred from direct assay///0007155 // cell adhesion // inferred from electronic annotation///0007411 // axon guidance // traceable author statement///0022617 // extracellular matrix disassembly // traceable author statement///0030198 // extracellular matrix organization // traceable author statement///0030574 // collagen catabolic process // traceable au…	0005576 // extracellular region // inferred from direct assay///0005576 // extracellular region // traceable author statement///0005578 // proteinaceous extracellular matrix // inferred from electronic annotation///0005581 // collagen trimer // inferred from electronic annotation///0005589 // collagen type VI trimer // non-traceable author statement///0005765 // lysosomal membrane // inferred fro…	0048407 // platelet-derived growth factor binding // inferred from direct assay	chr21:47420244-47424962 (-) // 99.87 // q22.3
216993_s_at	COL11A2	1302	0001501 // skeletal system development // inferred from mutant phenotype///0001501 // skeletal system development // non-traceable author statement///0001503 // ossification // inferred from electronic annotation///0001894 // tissue homeostasis // inferred from electronic annotation///0002062 // chondrocyte differentiation // inferred from electronic annotation///0007605 // sensory perception of …	0005576 // extracellular region // traceable author statement///0005578 // proteinaceous extracellular matrix // inferred from electronic annotation///0005581 // collagen trimer // inferred from electronic annotation///0005592 // collagen type XI trimer // non-traceable author statement///0005788 // endoplasmic reticulum lumen // traceable author statement///0005840 // ribosome // inferred from e…	0005201 // extracellular matrix structural constituent // inferred from electronic annotation///0005515 // protein binding // inferred from physical interaction///0030020 // extracellular matrix structural constituent conferring tensile strength // non-traceable author statement///0030674 // protein binding, bridging // non-traceable author statement///0046872 // metal ion binding // inferred fro…	chr6:33131170-33160017 (-) // 99.58 // p21.32
217312_s_at	COL7A1	1294	0006888 // ER to Golgi vesicle-mediated transport // traceable author statement///0007155 // cell adhesion // inferred from electronic annotation///0008544 // epidermis development // traceable author statement///0010466 // negative regulation of peptidase activity // inferred from electronic annotation///0010951 // negative regulation of endopeptidase activity // inferred from electronic annotat…	0000139 // Golgi membrane // traceable author statement///0005576 // extracellular region // traceable author statement///0005578 // proteinaceous extracellular matrix // inferred from electronic annotation///0005581 // collagen trimer // inferred from electronic annotation///0005590 // collagen type VII trimer // traceable author statement///0005604 // basement membrane // inferred from electron…	0004867 // serine-type endopeptidase inhibitor activity // inferred from electronic annotation///0005515 // protein binding // inferred from physical interaction///0030414 // peptidase inhibitor activity // inferred from electronic annotation///0042802 // identical protein binding // inferred from electronic annotation	chr3:48601838-48632592 (-) // 99.93 // p21.31
217404_s_at	COL2A1	1280	0001501 // skeletal system development // inferred from mutant phenotype///0001502 // cartilage condensation // inferred from electronic annotation///0001503 // ossification // inferred from electronic annotation///0001894 // tissue homeostasis // inferred from electronic annotation///0001958 // endochondral ossification // inferred from electronic annotation///0002062 // chondrocyte differentiat…	0005576 // extracellular region // traceable author statement///0005578 // proteinaceous extracellular matrix // inferred from electronic annotation///0005581 // collagen trimer // inferred from electronic annotation///0005585 // collagen type II trimer // inferred from direct assay///0005604 // basement membrane // inferred from electronic annotation///0005615 // extracellular space // inferred …	0005201 // extracellular matrix structural constituent // inferred from electronic annotation///0005515 // protein binding // inferred from electronic annotation///0030020 // extracellular matrix structural constituent conferring tensile strength // inferred by curator///0042802 // identical protein binding // non-traceable author statement///0046872 // metal ion binding // inferred from electron…	chr12:48367189-48398104 (-) // 98.12 // q13.11
217428_s_at	COL10A1	1300	0001501 // skeletal system development // traceable author statement///0001958 // endochondral ossification // inferred from electronic annotation///0022617 // extracellular matrix disassembly // traceable author statement///0030198 // extracellular matrix organization // traceable author statement///0030574 // collagen catabolic process // traceable author statement///0051216 // cartilage develo…	0005576 // extracellular region // traceable author statement///0005578 // proteinaceous extracellular matrix // inferred from electronic annotation///0005581 // collagen trimer // inferred from electronic annotation///0005788 // endoplasmic reticulum lumen // traceable author statement///0005938 // cell cortex // inferred from electronic annotation	0005515 // protein binding // inferred from physical interaction///0046872 // metal ion binding // inferred from electronic annotation	chr6:116440189-116447296 (-) // 98.09 // q22.1
217430_x_at	COL1A1	1277	0001501 // skeletal system development // inferred from mutant phenotype///0001503 // ossification // inferred from electronic annotation///0001568 // blood vessel development // inferred from mutant phenotype///0001649 // osteoblast differentiation // inferred from electronic annotation///0001957 // intramembranous ossification // inferred from electronic annotation///0001958 // endochondral oss…	0005576 // extracellular region // traceable author statement///0005578 // proteinaceous extracellular matrix // inferred from electronic annotation///0005581 // collagen trimer // inferred from electronic annotation///0005584 // collagen type I trimer // inferred from mutant phenotype///0005615 // extracellular space // inferred from direct assay///0005737 // cytoplasm // inferred from electroni…	0005201 // extracellular matrix structural constituent // inferred from electronic annotation///0005515 // protein binding // inferred from physical interaction///0042802 // identical protein binding // inferred from direct assay///0046872 // metal ion binding // inferred from electronic annotation///0048407 // platelet-derived growth factor binding // inferred from direct assay	chr17:48268176-48268762 (-) // 67.2 // q21.33
218975_at	COL5A3	50509	0007160 // cell-matrix adhesion // inferred from electronic annotation///0007411 // axon guidance // traceable author statement///0022617 // extracellular matrix disassembly // traceable author statement///0030198 // extracellular matrix organization // traceable author statement///0030199 // collagen fibril organization // non-traceable author statement///0030574 // collagen catabolic process //…	0005576 // extracellular region // traceable author statement///0005578 // proteinaceous extracellular matrix // inferred from electronic annotation///0005581 // collagen trimer // inferred from electronic annotation///0005588 // collagen type V trimer // non-traceable author statement///0005788 // endoplasmic reticulum lumen // traceable author statement///0031012 // extracellular matrix // infe…	0005201 // extracellular matrix structural constituent // non-traceable author statement///0005518 // collagen binding // non-traceable author statement///0008201 // heparin binding // inferred from electronic annotation///0043394 // proteoglycan binding // inferred from electronic annotation	chr19:10070236-10121147 (-) // 99.08 // p13.2
219625_s_at	COL4A3BP	10087	0000902 // cell morphogenesis // inferred from electronic annotation///0001701 // in utero embryonic development // inferred from electronic annotation///0003007 // heart morphogenesis // inferred from electronic annotation///0006468 // protein phosphorylation // traceable author statement///0006665 // sphingolipid metabolic process // traceable author statement///0006672 // ceramide metabolic pr…	0005581 // collagen trimer // inferred from electronic annotation///0005654 // nucleoplasm // inferred from direct assay///0005737 // cytoplasm // inferred from electronic annotation///0005739 // mitochondrion // inferred from electronic annotation///0005783 // endoplasmic reticulum // inferred from electronic annotation///0005789 // endoplasmic reticulum membrane // traceable author statement///…	0004672 // protein kinase activity // traceable author statement///0005515 // protein binding // inferred from physical interaction///0008289 // lipid binding // inferred from electronic annotation///0016301 // kinase activity // inferred from electronic annotation///0035620 // ceramide transporter activity // inferred from direct assay///0070273 // phosphatidylinositol-4-phosphate binding // inf…	chr5:74675064-74807440 (-) // 98.91 // q13.3
221152_at	COL8A1	1295	0001525 // angiogenesis // inferred from electronic annotation///0007155 // cell adhesion // inferred from electronic annotation///0010811 // positive regulation of cell-substrate adhesion // inferred from electronic annotation///0022617 // extracellular matrix disassembly // traceable author statement///0030198 // extracellular matrix organization // traceable author statement///0030574 // colla…	0005576 // extracellular region // traceable author statement///0005578 // proteinaceous extracellular matrix // inferred from electronic annotation///0005581 // collagen trimer // inferred from electronic annotation///0005591 // collagen type VIII trimer // traceable author statement///0005604 // basement membrane // inferred from electronic annotation///0005788 // endoplasmic reticulum lumen //…	0005515 // protein binding // inferred from physical interaction	chr3:99357454-99399306 (+) // 77.19 // q12.1
221729_at	COL5A2	1290	0001501 // skeletal system development // inferred from electronic annotation///0001503 // ossification // inferred from electronic annotation///0007411 // axon guidance // traceable author statement///0022617 // extracellular matrix disassembly // traceable author statement///0030198 // extracellular matrix organization // traceable author statement///0030199 // collagen fibril organization // i…	0005576 // extracellular region // traceable author statement///0005578 // proteinaceous extracellular matrix // inferred from electronic annotation///0005581 // collagen trimer // inferred from electronic annotation///0005588 // collagen type V trimer // inferred from mutant phenotype///0005788 // endoplasmic reticulum lumen // traceable author statement///0031012 // extracellular matrix // non-…	0005201 // extracellular matrix structural constituent // inferred from electronic annotation///0005515 // protein binding // inferred from electronic annotation///0046332 // SMAD binding // inferred from electronic annotation///0046872 // metal ion binding // inferred from electronic annotation	chr2:189896621-190044597 (-) // 98.3 // q32.2
221730_at	COL5A2	1290	0001501 // skeletal system development // inferred from electronic annotation///0001503 // ossification // inferred from electronic annotation///0007411 // axon guidance // traceable author statement///0022617 // extracellular matrix disassembly // traceable author statement///0030198 // extracellular matrix organization // traceable author statement///0030199 // collagen fibril organization // i…	0005576 // extracellular region // traceable author statement///0005578 // proteinaceous extracellular matrix // inferred from electronic annotation///0005581 // collagen trimer // inferred from electronic annotation///0005588 // collagen type V trimer // inferred from mutant phenotype///0005788 // endoplasmic reticulum lumen // traceable author statement///0031012 // extracellular matrix // non-…	0005201 // extracellular matrix structural constituent // inferred from electronic annotation///0005515 // protein binding // inferred from electronic annotation///0046332 // SMAD binding // inferred from electronic annotation///0046872 // metal ion binding // inferred from electronic annotation	chr2:189896621-190044597 (-) // 98.3 // q32.2
221900_at	COL8A2	1296	0001525 // angiogenesis // inferred from electronic annotation///0007155 // cell adhesion // inferred from electronic annotation///0016337 // single organismal cell-cell adhesion // non-traceable author statement///0022617 // extracellular matrix disassembly // traceable author statement///0030198 // extracellular matrix organization // non-traceable author statement///0030198 // extracellular ma…	0005576 // extracellular region // traceable author statement///0005578 // proteinaceous extracellular matrix // non-traceable author statement///0005581 // collagen trimer // inferred from electronic annotation///0005604 // basement membrane // non-traceable author statement///0005788 // endoplasmic reticulum lumen // traceable author statement///0031012 // extracellular matrix // inferred from …	0005201 // extracellular matrix structural constituent // non-traceable author statement///0005515 // protein binding // inferred from physical interaction///0005515 // protein binding // inferred from electronic annotation///0030674 // protein binding, bridging // non-traceable author statement	chr1:36560839-36565116 (-) // 99.07 // p34.3
222008_at	COL9A1	1297	0001894 // tissue homeostasis // inferred from electronic annotation///0003417 // growth plate cartilage development // inferred from electronic annotation///0007411 // axon guidance // traceable author statement///0009887 // organ morphogenesis // traceable author statement///0022617 // extracellular matrix disassembly // traceable author statement///0030198 // extracellular matrix organization …	0005576 // extracellular region // traceable author statement///0005578 // proteinaceous extracellular matrix // inferred from electronic annotation///0005581 // collagen trimer // inferred from electronic annotation///0005594 // collagen type IX trimer // inferred from direct assay///0005594 // collagen type IX trimer // traceable author statement///0005788 // endoplasmic reticulum lumen // trac…	0030020 // extracellular matrix structural constituent conferring tensile strength // inferred by curator///0046872 // metal ion binding // inferred from electronic annotation	chr6:70925735-71012786 (-) // 98.58 // q13
222073_at	COL4A3	1285	0006919 // activation of cysteine-type endopeptidase activity involved in apoptotic process // inferred from direct assay///0007155 // cell adhesion // inferred from electronic annotation///0007166 // cell surface receptor signaling pathway // non-traceable author statement///0007411 // axon guidance // traceable author statement///0007605 // sensory perception of sound // traceable author statem…	0005576 // extracellular region // traceable author statement///0005578 // proteinaceous extracellular matrix // inferred from electronic annotation///0005581 // collagen trimer // inferred from electronic annotation///0005587 // collagen type IV trimer // inferred from direct assay///0005604 // basement membrane // inferred from direct assay///0005783 // endoplasmic reticulum // inferred from di…	0005178 // integrin binding // inferred from direct assay///0005178 // integrin binding // traceable author statement///0005198 // structural molecule activity // non-traceable author statement///0005201 // extracellular matrix structural constituent // inferred from electronic annotation///0005515 // protein binding // inferred from physical interaction///0008191 // metalloendopeptidase inhibito…	chr2:228177181-228177932 (+) // 87.77 // q36.3
37892_at	COL11A1	1301	0001502 // cartilage condensation // inferred from electronic annotation///0001503 // ossification // inferred from electronic annotation///0002063 // chondrocyte development // inferred from electronic annotation///0003007 // heart morphogenesis // inferred from electronic annotation///0006029 // proteoglycan metabolic process // inferred from electronic annotation///0007601 // visual perception…	0005576 // extracellular region // traceable author statement///0005578 // proteinaceous extracellular matrix // inferred from electronic annotation///0005581 // collagen trimer // inferred from electronic annotation///0005592 // collagen type XI trimer // inferred from direct assay///0005592 // collagen type XI trimer // non-traceable author statement///0005788 // endoplasmic reticulum lumen // …	0005201 // extracellular matrix structural constituent // non-traceable author statement///0030674 // protein binding, bridging // non-traceable author statement///0046872 // metal ion binding // inferred from electronic annotation///0050840 // extracellular matrix binding // non-traceable author statement	chr1:103342947-103573895 (-) // 91.11 // p21.1
52255_s_at	COL5A3	50509	0007160 // cell-matrix adhesion // inferred from electronic annotation///0007411 // axon guidance // traceable author statement///0022617 // extracellular matrix disassembly // traceable author statement///0030198 // extracellular matrix organization // traceable author statement///0030199 // collagen fibril organization // non-traceable author statement///0030574 // collagen catabolic process //…	0005576 // extracellular region // traceable author statement///0005578 // proteinaceous extracellular matrix // inferred from electronic annotation///0005581 // collagen trimer // inferred from electronic annotation///0005588 // collagen type V trimer // non-traceable author statement///0005788 // endoplasmic reticulum lumen // traceable author statement///0031012 // extracellular matrix // infe…	0005201 // extracellular matrix structural constituent // non-traceable author statement///0005518 // collagen binding // non-traceable author statement///0008201 // heparin binding // inferred from electronic annotation///0043394 // proteoglycan binding // inferred from electronic annotation	chr19:10070236-10070745 (-) // 87.6 // p13.2
52651_at	COL8A2	1296	0001525 // angiogenesis // inferred from electronic annotation///0007155 // cell adhesion // inferred from electronic annotation///0016337 // single organismal cell-cell adhesion // non-traceable author statement///0022617 // extracellular matrix disassembly // traceable author statement///0030198 // extracellular matrix organization // non-traceable author statement///0030198 // extracellular ma…	0005576 // extracellular region // traceable author statement///0005578 // proteinaceous extracellular matrix // non-traceable author statement///0005581 // collagen trimer // inferred from electronic annotation///0005604 // basement membrane // non-traceable author statement///0005788 // endoplasmic reticulum lumen // traceable author statement///0031012 // extracellular matrix // inferred from …	0005201 // extracellular matrix structural constituent // non-traceable author statement///0005515 // protein binding // inferred from physical interaction///0005515 // protein binding // inferred from electronic annotation///0030674 // protein binding, bridging // non-traceable author statement	chr1:36561025-36561705 (-) // 98.41 // p34.3
223465_at	COL4A3BP	10087	0000902 // cell morphogenesis // inferred from electronic annotation///0001701 // in utero embryonic development // inferred from electronic annotation///0003007 // heart morphogenesis // inferred from electronic annotation///0006468 // protein phosphorylation // traceable author statement///0006665 // sphingolipid metabolic process // traceable author statement///0006672 // ceramide metabolic pr…	0005581 // collagen trimer // inferred from electronic annotation///0005654 // nucleoplasm // inferred from direct assay///0005737 // cytoplasm // inferred from electronic annotation///0005739 // mitochondrion // inferred from electronic annotation///0005783 // endoplasmic reticulum // inferred from electronic annotation///0005789 // endoplasmic reticulum membrane // traceable author statement///…	0004672 // protein kinase activity // traceable author statement///0005515 // protein binding // inferred from physical interaction///0008289 // lipid binding // inferred from electronic annotation///0016301 // kinase activity // inferred from electronic annotation///0035620 // ceramide transporter activity // inferred from direct assay///0070273 // phosphatidylinositol-4-phosphate binding // inf…	chr5:74668206-74807438 (-) // 97.79 // q13.3
223466_x_at	COL4A3BP	10087	0000902 // cell morphogenesis // inferred from electronic annotation///0001701 // in utero embryonic development // inferred from electronic annotation///0003007 // heart morphogenesis // inferred from electronic annotation///0006468 // protein phosphorylation // traceable author statement///0006665 // sphingolipid metabolic process // traceable author statement///0006672 // ceramide metabolic pr…	0005581 // collagen trimer // inferred from electronic annotation///0005654 // nucleoplasm // inferred from direct assay///0005737 // cytoplasm // inferred from electronic annotation///0005739 // mitochondrion // inferred from electronic annotation///0005783 // endoplasmic reticulum // inferred from electronic annotation///0005789 // endoplasmic reticulum membrane // traceable author statement///…	0004672 // protein kinase activity // traceable author statement///0005515 // protein binding // inferred from physical interaction///0008289 // lipid binding // inferred from electronic annotation///0016301 // kinase activity // inferred from electronic annotation///0035620 // ceramide transporter activity // inferred from direct assay///0070273 // phosphatidylinositol-4-phosphate binding // inf…	chr5:74669982-74807438 (-) // 97.28 // q13.3
224388_s_at	COL25A1	84570	0022617 // extracellular matrix disassembly // traceable author statement///0030198 // extracellular matrix organization // traceable author statement///0030574 // collagen catabolic process // traceable author statement///0060385 // axonogenesis involved in innervation // inferred from electronic annotation	0005576 // extracellular region // inferred from direct assay///0005576 // extracellular region // traceable author statement///0005581 // collagen trimer // inferred from electronic annotation///0005615 // extracellular space // inferred from direct assay///0005788 // endoplasmic reticulum lumen // traceable author statement///0005886 // plasma membrane // traceable author statement///0005887 //…	0001540 // beta-amyloid binding // inferred from direct assay///0008201 // heparin binding // inferred from direct assay	chr4:109734971-110223799 (-) // 97.97 // q25
224389_s_at	COL25A1	84570	0022617 // extracellular matrix disassembly // traceable author statement///0030198 // extracellular matrix organization // traceable author statement///0030574 // collagen catabolic process // traceable author statement///0060385 // axonogenesis involved in innervation // inferred from electronic annotation	0005576 // extracellular region // inferred from direct assay///0005576 // extracellular region // traceable author statement///0005581 // collagen trimer // inferred from electronic annotation///0005615 // extracellular space // inferred from direct assay///0005788 // endoplasmic reticulum lumen // traceable author statement///0005886 // plasma membrane // traceable author statement///0005887 //…	0001540 // beta-amyloid binding // inferred from direct assay///0008201 // heparin binding // inferred from direct assay	chr4:109745040-110223799 (-) // 97.97 // q25
225288_at	COL27A1	85301	0003431 // growth plate cartilage chondrocyte development // inferred from electronic annotation///0030198 // extracellular matrix organization // traceable author statement	0005576 // extracellular region // traceable author statement///0005578 // proteinaceous extracellular matrix // inferred from electronic annotation///0005581 // collagen trimer // inferred from electronic annotation///0005583 // fibrillar collagen trimer // inferred from electronic annotation///0005788 // endoplasmic reticulum lumen // traceable author statement	0005201 // extracellular matrix structural constituent // inferred from electronic annotation///0046872 // metal ion binding // inferred from electronic annotation	chr9:117069690-117074794 (+) // 94.39 // q32
225292_at	COL27A1	85301	0003431 // growth plate cartilage chondrocyte development // inferred from electronic annotation///0030198 // extracellular matrix organization // traceable author statement	0005576 // extracellular region // traceable author statement///0005578 // proteinaceous extracellular matrix // inferred from electronic annotation///0005581 // collagen trimer // inferred from electronic annotation///0005583 // fibrillar collagen trimer // inferred from electronic annotation///0005788 // endoplasmic reticulum lumen // traceable author statement	0005201 // extracellular matrix structural constituent // inferred from electronic annotation///0046872 // metal ion binding // inferred from electronic annotation	chr9:117069690-117074794 (+) // 94.39 // q32
225293_at	COL27A1	85301	0003431 // growth plate cartilage chondrocyte development // inferred from electronic annotation///0030198 // extracellular matrix organization // traceable author statement	0005576 // extracellular region // traceable author statement///0005578 // proteinaceous extracellular matrix // inferred from electronic annotation///0005581 // collagen trimer // inferred from electronic annotation///0005583 // fibrillar collagen trimer // inferred from electronic annotation///0005788 // endoplasmic reticulum lumen // traceable author statement	0005201 // extracellular matrix structural constituent // inferred from electronic annotation///0046872 // metal ion binding // inferred from electronic annotation	chr9:117069690-117074794 (+) // 94.39 // q32
225664_at	COL12A1	1303	0001501 // skeletal system development // traceable author statement///0007155 // cell adhesion // inferred from electronic annotation///0022617 // extracellular matrix disassembly // traceable author statement///0030198 // extracellular matrix organization // traceable author statement///0030199 // collagen fibril organization // non-traceable author statement///0030574 // collagen catabolic pro…	0005576 // extracellular region // traceable author statement///0005578 // proteinaceous extracellular matrix // inferred from electronic annotation///0005581 // collagen trimer // inferred from electronic annotation///0005595 // collagen type XII trimer // non-traceable author statement///0005615 // extracellular space // inferred from direct assay///0005788 // endoplasmic reticulum lumen // tra…	0005515 // protein binding // inferred from electronic annotation///0030020 // extracellular matrix structural constituent conferring tensile strength // non-traceable author statement	chr6:75794041-75795220 (-) // 92.83 // q13
226237_at	COL8A1	1295	0001525 // angiogenesis // inferred from electronic annotation///0007155 // cell adhesion // inferred from electronic annotation///0010811 // positive regulation of cell-substrate adhesion // inferred from electronic annotation///0022617 // extracellular matrix disassembly // traceable author statement///0030198 // extracellular matrix organization // traceable author statement///0030574 // colla…	0005576 // extracellular region // traceable author statement///0005578 // proteinaceous extracellular matrix // inferred from electronic annotation///0005581 // collagen trimer // inferred from electronic annotation///0005591 // collagen type VIII trimer // traceable author statement///0005604 // basement membrane // inferred from electronic annotation///0005788 // endoplasmic reticulum lumen //…	0005515 // protein binding // inferred from physical interaction	chr3:99516304-99518060 (+) // 89.01 // q12.1
226277_at	COL4A3BP	10087	0000902 // cell morphogenesis // inferred from electronic annotation///0001701 // in utero embryonic development // inferred from electronic annotation///0003007 // heart morphogenesis // inferred from electronic annotation///0006468 // protein phosphorylation // traceable author statement///0006665 // sphingolipid metabolic process // traceable author statement///0006672 // ceramide metabolic pr…	0005581 // collagen trimer // inferred from electronic annotation///0005654 // nucleoplasm // inferred from direct assay///0005737 // cytoplasm // inferred from electronic annotation///0005739 // mitochondrion // inferred from electronic annotation///0005783 // endoplasmic reticulum // inferred from electronic annotation///0005789 // endoplasmic reticulum membrane // traceable author statement///…	0004672 // protein kinase activity // traceable author statement///0005515 // protein binding // inferred from physical interaction///0008289 // lipid binding // inferred from electronic annotation///0016301 // kinase activity // inferred from electronic annotation///0035620 // ceramide transporter activity // inferred from direct assay///0070273 // phosphatidylinositol-4-phosphate binding // inf…	chr5:74666934-74668281 (-) // 98.25 // q13.3
228750_at	COL14A1	7373	0003229 // ventricular cardiac muscle tissue development // inferred from electronic annotation///0007155 // cell adhesion // inferred from electronic annotation///0016337 // single organismal cell-cell adhesion // non-traceable author statement///0022617 // extracellular matrix disassembly // traceable author statement///0030198 // extracellular matrix organization // non-traceable author statem…	0005576 // extracellular region // traceable author statement///0005578 // proteinaceous extracellular matrix // non-traceable author statement///0005581 // collagen trimer // non-traceable author statement///0005596 // collagen type XIV trimer // non-traceable author statement///0005614 // interstitial matrix // inferred from electronic annotation///0005615 // extracellular space // inferred fro…	0005201 // extracellular matrix structural constituent // non-traceable author statement///0005518 // collagen binding // non-traceable author statement///0030674 // protein binding, bridging // non-traceable author statement///0044822 // poly(A) RNA binding // inferred from direct assay	chr8:121385108-121385811 (+) // 89.64 // q24.12
228873_at	COL22A1	169044	0030198 // extracellular matrix organization // traceable author statement	0005576 // extracellular region // traceable author statement///0005578 // proteinaceous extracellular matrix // inferred from electronic annotation///0005581 // collagen trimer // inferred from electronic annotation///0005737 // cytoplasm // inferred from electronic annotation///0005788 // endoplasmic reticulum lumen // traceable author statement		chr8:139600478-139601233 (-) // 95.32 // q24.23
229080_at	COL26A1	136227	0010811 // positive regulation of cell-substrate adhesion // inferred from electronic annotation///0022617 // extracellular matrix disassembly // traceable author statement///0030198 // extracellular matrix organization // traceable author statement///0030574 // collagen catabolic process // traceable author statement	0005576 // extracellular region // traceable author statement///0005578 // proteinaceous extracellular matrix // inferred from electronic annotation///0005581 // collagen trimer // inferred from electronic annotation///0005783 // endoplasmic reticulum // inferred from electronic annotation///0005788 // endoplasmic reticulum lumen // traceable author statement///0005794 // Golgi apparatus // infer…	0005515 // protein binding // inferred from electronic annotation	chr7:101201207-101202303 (+) // 80.7 // q22.1
229168_at	COL23A1	91522	0022617 // extracellular matrix disassembly // traceable author statement///0030198 // extracellular matrix organization // traceable author statement///0030574 // collagen catabolic process // traceable author statement	0005581 // collagen trimer // inferred from electronic annotation///0005788 // endoplasmic reticulum lumen // traceable author statement///0005886 // plasma membrane // traceable author statement///0016020 // membrane // inferred from electronic annotation///0016021 // integral component of membrane // inferred from electronic annotation	0005515 // protein binding // inferred from physical interaction	chr5:177664618-177679586 (-) // 96.75 // q35.3
229218_at	COL1A2	1278	0001501 // skeletal system development // inferred from mutant phenotype///0001568 // blood vessel development // inferred from mutant phenotype///0006898 // receptor-mediated endocytosis // traceable author statement///0007179 // transforming growth factor beta receptor signaling pathway // inferred from direct assay///0007266 // Rho protein signal transduction // inferred from direct assay///00…	0005576 // extracellular region // traceable author statement///0005578 // proteinaceous extracellular matrix // inferred from electronic annotation///0005581 // collagen trimer // inferred from electronic annotation///0005584 // collagen type I trimer // inferred from direct assay///0005584 // collagen type I trimer // inferred from mutant phenotype///0005584 // collagen type I trimer // traceab…	0005201 // extracellular matrix structural constituent // non-traceable author statement///0005515 // protein binding // inferred from physical interaction///0030674 // protein binding, bridging // inferred from mutant phenotype///0042802 // identical protein binding // inferred from direct assay///0046332 // SMAD binding // inferred from electronic annotation///0046872 // metal ion binding // in…	chr7:94051044-94051884 (+) // 98.24 // q21.3
229271_x_at	COL11A1	1301	0001502 // cartilage condensation // inferred from electronic annotation///0001503 // ossification // inferred from electronic annotation///0002063 // chondrocyte development // inferred from electronic annotation///0003007 // heart morphogenesis // inferred from electronic annotation///0006029 // proteoglycan metabolic process // inferred from electronic annotation///0007601 // visual perception…	0005576 // extracellular region // traceable author statement///0005578 // proteinaceous extracellular matrix // inferred from electronic annotation///0005581 // collagen trimer // inferred from electronic annotation///0005592 // collagen type XI trimer // inferred from direct assay///0005592 // collagen type XI trimer // non-traceable author statement///0005788 // endoplasmic reticulum lumen // …	0005201 // extracellular matrix structural constituent // non-traceable author statement///0030674 // protein binding, bridging // non-traceable author statement///0046872 // metal ion binding // inferred from electronic annotation///0050840 // extracellular matrix binding // non-traceable author statement	chr1:103342028-103343014 (-) // 97.91 // p21.1
229779_at	COL4A4	1286	0007411 // axon guidance // traceable author statement///0022617 // extracellular matrix disassembly // traceable author statement///0030198 // extracellular matrix organization // traceable author statement///0030574 // collagen catabolic process // traceable author statement///0032836 // glomerular basement membrane development // inferred from mutant phenotype	0005576 // extracellular region // traceable author statement///0005578 // proteinaceous extracellular matrix // inferred from electronic annotation///0005581 // collagen trimer // inferred from electronic annotation///0005587 // collagen type IV trimer // inferred from direct assay///0005604 // basement membrane // inferred from electronic annotation///0005605 // basal lamina // inferred from di…	0005201 // extracellular matrix structural constituent // inferred from mutant phenotype	chr2:227867429-227868341 (-) // 80.56 // q36.3
230603_at	COL27A1	85301	0003431 // growth plate cartilage chondrocyte development // inferred from electronic annotation///0030198 // extracellular matrix organization // traceable author statement	0005576 // extracellular region // traceable author statement///0005578 // proteinaceous extracellular matrix // inferred from electronic annotation///0005581 // collagen trimer // inferred from electronic annotation///0005583 // fibrillar collagen trimer // inferred from electronic annotation///0005788 // endoplasmic reticulum lumen // traceable author statement	0005201 // extracellular matrix structural constituent // inferred from electronic annotation///0046872 // metal ion binding // inferred from electronic annotation	chr9:116929966-116930894 (+) // 91.15 // q32
230867_at	COL6A6	131873	0007155 // cell adhesion // inferred from electronic annotation///0022617 // extracellular matrix disassembly // traceable author statement///0030198 // extracellular matrix organization // traceable author statement///0030574 // collagen catabolic process // traceable author statement	0005576 // extracellular region // traceable author statement///0005578 // proteinaceous extracellular matrix // inferred from direct assay///0005581 // collagen trimer // inferred from electronic annotation		chr3:130395314-130396026 (+) // 96.1 // q22.1
231766_s_at	COL12A1	1303	0001501 // skeletal system development // traceable author statement///0007155 // cell adhesion // inferred from electronic annotation///0022617 // extracellular matrix disassembly // traceable author statement///0030198 // extracellular matrix organization // traceable author statement///0030199 // collagen fibril organization // non-traceable author statement///0030574 // collagen catabolic pro…	0005576 // extracellular region // traceable author statement///0005578 // proteinaceous extracellular matrix // inferred from electronic annotation///0005581 // collagen trimer // inferred from electronic annotation///0005595 // collagen type XII trimer // non-traceable author statement///0005615 // extracellular space // inferred from direct assay///0005788 // endoplasmic reticulum lumen // tra…	0005515 // protein binding // inferred from electronic annotation///0030020 // extracellular matrix structural constituent conferring tensile strength // non-traceable author statement	chr6:75795858-75915623 (-) // 99.2 // q13
231879_at	COL12A1	1303	0001501 // skeletal system development // traceable author statement///0007155 // cell adhesion // inferred from electronic annotation///0022617 // extracellular matrix disassembly // traceable author statement///0030198 // extracellular matrix organization // traceable author statement///0030199 // collagen fibril organization // non-traceable author statement///0030574 // collagen catabolic pro…	0005576 // extracellular region // traceable author statement///0005578 // proteinaceous extracellular matrix // inferred from electronic annotation///0005581 // collagen trimer // inferred from electronic annotation///0005595 // collagen type XII trimer // non-traceable author statement///0005615 // extracellular space // inferred from direct assay///0005788 // endoplasmic reticulum lumen // tra…	0005515 // protein binding // inferred from electronic annotation///0030020 // extracellular matrix structural constituent conferring tensile strength // non-traceable author statement	chr6:75795084-75875495 (-) // 98.84 // q13
232458_at	COL3A1	1281	0001501 // skeletal system development // inferred from electronic annotation///0001568 // blood vessel development // inferred from electronic annotation///0006898 // receptor-mediated endocytosis // traceable author statement///0007160 // cell-matrix adhesion // inferred from direct assay///0007179 // transforming growth factor beta receptor signaling pathway // inferred from direct assay///000…	0005576 // extracellular region // traceable author statement///0005578 // proteinaceous extracellular matrix // inferred from electronic annotation///0005581 // collagen trimer // inferred from electronic annotation///0005586 // collagen type III trimer // inferred from mutant phenotype///0005586 // collagen type III trimer // non-traceable author statement///0005615 // extracellular space // in…	0005178 // integrin binding // inferred from mutant phenotype///0005178 // integrin binding // non-traceable author statement///0005201 // extracellular matrix structural constituent // inferred from mutant phenotype///0005515 // protein binding // inferred from physical interaction///0046332 // SMAD binding // inferred from electronic annotation///0046872 // metal ion binding // inferred from el…	chr2:189841810-189843482 (+) // 87.0 // q32.2
232542_at	COL9A2	1298	0001501 // skeletal system development // traceable author statement///0007411 // axon guidance // traceable author statement///0022617 // extracellular matrix disassembly // traceable author statement///0030198 // extracellular matrix organization // traceable author statement///0030574 // collagen catabolic process // traceable author statement	0005576 // extracellular region // traceable author statement///0005578 // proteinaceous extracellular matrix // inferred from electronic annotation///0005581 // collagen trimer // inferred from electronic annotation///0005594 // collagen type IX trimer // inferred from direct assay///0005788 // endoplasmic reticulum lumen // traceable author statement	0030020 // extracellular matrix structural constituent conferring tensile strength // inferred by curator	chr1:40764220-40765701 (-) // 65.38 // p34.2
232638_at	COL20A1	57642	0030198 // extracellular matrix organization // traceable author statement	0005576 // extracellular region // traceable author statement///0005581 // collagen trimer // inferred from electronic annotation///0005615 // extracellular space // inferred from electronic annotation///0005788 // endoplasmic reticulum lumen // traceable author statement///0031012 // extracellular matrix // traceable author statement	0005515 // protein binding // inferred from physical interaction	chr20:61937364-61966203 (+) // 87.73 // q13.33
232733_s_at	COL20A1	57642	0030198 // extracellular matrix organization // traceable author statement	0005576 // extracellular region // traceable author statement///0005581 // collagen trimer // inferred from electronic annotation///0005615 // extracellular space // inferred from electronic annotation///0005788 // endoplasmic reticulum lumen // traceable author statement///0031012 // extracellular matrix // traceable author statement	0005515 // protein binding // inferred from physical interaction	chr20:61955664-61962285 (+) // 73.09 // q13.33
233109_at	COL12A1	1303	0001501 // skeletal system development // traceable author statement///0007155 // cell adhesion // inferred from electronic annotation///0022617 // extracellular matrix disassembly // traceable author statement///0030198 // extracellular matrix organization // traceable author statement///0030199 // collagen fibril organization // non-traceable author statement///0030574 // collagen catabolic pro…	0005576 // extracellular region // traceable author statement///0005578 // proteinaceous extracellular matrix // inferred from electronic annotation///0005581 // collagen trimer // inferred from electronic annotation///0005595 // collagen type XII trimer // non-traceable author statement///0005615 // extracellular space // inferred from direct assay///0005788 // endoplasmic reticulum lumen // tra…	0030020 // extracellular matrix structural constituent conferring tensile strength // non-traceable author statement	chr6:75831591-75833880 (-) // 75.82 // q13
233894_x_at	COL26A1	136227	0010811 // positive regulation of cell-substrate adhesion // inferred from electronic annotation///0022617 // extracellular matrix disassembly // traceable author statement///0030198 // extracellular matrix organization // traceable author statement///0030574 // collagen catabolic process // traceable author statement	0005576 // extracellular region // traceable author statement///0005578 // proteinaceous extracellular matrix // inferred from electronic annotation///0005581 // collagen trimer // inferred from electronic annotation///0005783 // endoplasmic reticulum // inferred from electronic annotation///0005788 // endoplasmic reticulum lumen // traceable author statement///0005794 // Golgi apparatus // infer…	0005515 // protein binding // inferred from electronic annotation	chr7:101196606-101200819 (+) // 98.37 // q22.1
234387_at	COL4A5	1287	0007411 // axon guidance // traceable author statement///0007528 // neuromuscular junction development // inferred from electronic annotation///0022617 // extracellular matrix disassembly // traceable author statement///0030198 // extracellular matrix organization // traceable author statement///0030574 // collagen catabolic process // traceable author statement///0042491 // auditory receptor cel…	0005576 // extracellular region // traceable author statement///0005578 // proteinaceous extracellular matrix // inferred from electronic annotation///0005581 // collagen trimer // inferred from electronic annotation///0005587 // collagen type IV trimer // inferred from electronic annotation///0005604 // basement membrane // inferred from electronic annotation///0005605 // basal lamina // inferre…	0003779 // actin binding // inferred from electronic annotation///0005201 // extracellular matrix structural constituent // inferred from electronic annotation///0005509 // calcium ion binding // inferred from electronic annotation///0046872 // metal ion binding // inferred from electronic annotation	chrX:107683153-107683436 (+) // 100.0 // q22.3
234951_s_at	COL12A1	1303	0001501 // skeletal system development // traceable author statement///0007155 // cell adhesion // inferred from electronic annotation///0022617 // extracellular matrix disassembly // traceable author statement///0030198 // extracellular matrix organization // traceable author statement///0030199 // collagen fibril organization // non-traceable author statement///0030574 // collagen catabolic pro…	0005576 // extracellular region // traceable author statement///0005578 // proteinaceous extracellular matrix // inferred from electronic annotation///0005581 // collagen trimer // inferred from electronic annotation///0005595 // collagen type XII trimer // non-traceable author statement///0005615 // extracellular space // inferred from direct assay///0005788 // endoplasmic reticulum lumen // tra…	0005515 // protein binding // inferred from electronic annotation///0030020 // extracellular matrix structural constituent conferring tensile strength // non-traceable author statement	chr6:75892760-75912508 (-) // 100.0 // q13
238732_at	COL24A1	255631	0002244 // hematopoietic progenitor cell differentiation // inferred from electronic annotation///0030198 // extracellular matrix organization // traceable author statement	0005576 // extracellular region // traceable author statement///0005578 // proteinaceous extracellular matrix // inferred from electronic annotation///0005581 // collagen trimer // inferred from electronic annotation///0005788 // endoplasmic reticulum lumen // traceable author statement	0005201 // extracellular matrix structural constituent // inferred from electronic annotation///0005515 // protein binding // inferred from physical interaction	chr1:86194917-86195381 (-) // 94.5 // p22.3
239921_at	COL28A1	340267	0007155 // cell adhesion // inferred from electronic annotation///0010466 // negative regulation of peptidase activity // inferred from electronic annotation///0010951 // negative regulation of endopeptidase activity // inferred from electronic annotation///0030198 // extracellular matrix organization // traceable author statement	0005576 // extracellular region // traceable author statement///0005578 // proteinaceous extracellular matrix // inferred from electronic annotation///0005581 // collagen trimer // inferred from electronic annotation///0005604 // basement membrane // inferred from electronic annotation///0005788 // endoplasmic reticulum lumen // traceable author statement	0004867 // serine-type endopeptidase inhibitor activity // inferred from electronic annotation///0030414 // peptidase inhibitor activity // inferred from electronic annotation
241565_at	COL4A4	1286	0007411 // axon guidance // traceable author statement///0022617 // extracellular matrix disassembly // traceable author statement///0030198 // extracellular matrix organization // traceable author statement///0030574 // collagen catabolic process // traceable author statement///0032836 // glomerular basement membrane development // inferred from mutant phenotype	0005576 // extracellular region // traceable author statement///0005587 // collagen type IV trimer // inferred from direct assay///0005605 // basal lamina // inferred from direct assay///0005788 // endoplasmic reticulum lumen // traceable author statement	0005201 // extracellular matrix structural constituent // inferred from mutant phenotype	chr2:227874930-227886810 (+) // 99.49 // q36.3
242326_at	COL22A1	169044	0030198 // extracellular matrix organization // traceable author statement	0005576 // extracellular region // traceable author statement///0005578 // proteinaceous extracellular matrix // inferred from electronic annotation///0005581 // collagen trimer // inferred from electronic annotation///0005737 // cytoplasm // inferred from electronic annotation///0005788 // endoplasmic reticulum lumen // traceable author statement		chr8:139790150-139790621 (-) // 60.42 // q24.23
242345_at	COL28A1	340267	0007155 // cell adhesion // inferred from electronic annotation///0010466 // negative regulation of peptidase activity // inferred from electronic annotation///0010951 // negative regulation of endopeptidase activity // inferred from electronic annotation///0030198 // extracellular matrix organization // traceable author statement	0005576 // extracellular region // traceable author statement///0005578 // proteinaceous extracellular matrix // inferred from electronic annotation///0005581 // collagen trimer // inferred from electronic annotation///0005604 // basement membrane // inferred from electronic annotation///0005788 // endoplasmic reticulum lumen // traceable author statement	0004867 // serine-type endopeptidase inhibitor activity // inferred from electronic annotation///0030414 // peptidase inhibitor activity // inferred from electronic annotation	chr7:7398182-7400134 (-) // 95.16 // p21.3
242641_at	COL6A6	131873	0007155 // cell adhesion // inferred from electronic annotation///0022617 // extracellular matrix disassembly // traceable author statement///0030198 // extracellular matrix organization // traceable author statement///0030574 // collagen catabolic process // traceable author statement	0005576 // extracellular region // traceable author statement///0005578 // proteinaceous extracellular matrix // inferred from direct assay///0005581 // collagen trimer // inferred from electronic annotation		chr3:130396414-130396873 (+) // 67.75 // q22.1
243301_at	COL22A1	169044	0030198 // extracellular matrix organization // traceable author statement	0005576 // extracellular region // traceable author statement///0005578 // proteinaceous extracellular matrix // inferred from electronic annotation///0005581 // collagen trimer // inferred from electronic annotation///0005737 // cytoplasm // inferred from electronic annotation///0005788 // endoplasmic reticulum lumen // traceable author statement		chr8:139837963-139839020 (-) // 97.61 // q24.23
1553834_at	COL6A5	256076	0007155 // cell adhesion // inferred from electronic annotation///0022617 // extracellular matrix disassembly // traceable author statement///0030198 // extracellular matrix organization // traceable author statement///0030574 // collagen catabolic process // traceable author statement	0005576 // extracellular region // inferred from direct assay///0005576 // extracellular region // traceable author statement///0005578 // proteinaceous extracellular matrix // inferred from electronic annotation///0005581 // collagen trimer // inferred from electronic annotation///0031012 // extracellular matrix // inferred from sequence or structural similarity	0005515 // protein binding // inferred from physical interaction	chr3:130159467-130203688 (+) // 96.92 // q22.1
1553835_a_at	COL6A5	256076	0007155 // cell adhesion // inferred from electronic annotation///0022617 // extracellular matrix disassembly // traceable author statement///0030198 // extracellular matrix organization // traceable author statement///0030574 // collagen catabolic process // traceable author statement	0005576 // extracellular region // inferred from direct assay///0005576 // extracellular region // traceable author statement///0005578 // proteinaceous extracellular matrix // inferred from electronic annotation///0005581 // collagen trimer // inferred from electronic annotation///0031012 // extracellular matrix // inferred from sequence or structural similarity	0005515 // protein binding // inferred from physical interaction	chr3:130159467-130203688 (+) // 96.92 // q22.1
1555253_at	COL25A1	84570	0022617 // extracellular matrix disassembly // traceable author statement///0030198 // extracellular matrix organization // traceable author statement///0030574 // collagen catabolic process // traceable author statement///0060385 // axonogenesis involved in innervation // inferred from electronic annotation	0005576 // extracellular region // inferred from direct assay///0005576 // extracellular region // traceable author statement///0005581 // collagen trimer // inferred from electronic annotation///0005615 // extracellular space // inferred from direct assay///0005788 // endoplasmic reticulum lumen // traceable author statement///0005886 // plasma membrane // traceable author statement///0005887 //…	0001540 // beta-amyloid binding // inferred from direct assay///0008201 // heparin binding // inferred from direct assay	chr4:109731877-110223519 (-) // 98.19 // q25
1555527_at	COL9A1	1297	0001894 // tissue homeostasis // inferred from electronic annotation///0003417 // growth plate cartilage development // inferred from electronic annotation///0007411 // axon guidance // traceable author statement///0009887 // organ morphogenesis // traceable author statement///0022617 // extracellular matrix disassembly // traceable author statement///0030198 // extracellular matrix organization …	0005576 // extracellular region // traceable author statement///0005578 // proteinaceous extracellular matrix // inferred from electronic annotation///0005581 // collagen trimer // inferred from electronic annotation///0005594 // collagen type IX trimer // inferred from direct assay///0005594 // collagen type IX trimer // traceable author statement///0005788 // endoplasmic reticulum lumen // trac…	0030020 // extracellular matrix structural constituent conferring tensile strength // inferred by curator///0046872 // metal ion binding // inferred from electronic annotation	chr6:70989465-71012773 (-) // 98.77 // q13
1556499_s_at	COL1A1	1277	0001501 // skeletal system development // inferred from mutant phenotype///0001503 // ossification // inferred from electronic annotation///0001568 // blood vessel development // inferred from mutant phenotype///0001649 // osteoblast differentiation // inferred from electronic annotation///0001957 // intramembranous ossification // inferred from electronic annotation///0001958 // endochondral oss…	0005576 // extracellular region // traceable author statement///0005578 // proteinaceous extracellular matrix // inferred from electronic annotation///0005581 // collagen trimer // inferred from electronic annotation///0005584 // collagen type I trimer // inferred from mutant phenotype///0005615 // extracellular space // inferred from direct assay///0005737 // cytoplasm // inferred from electroni…	0005201 // extracellular matrix structural constituent // inferred from electronic annotation///0005515 // protein binding // inferred from physical interaction///0042802 // identical protein binding // inferred from direct assay///0046872 // metal ion binding // inferred from electronic annotation///0048407 // platelet-derived growth factor binding // inferred from direct assay	chr17:48262637-48262830 (-) // 57.1 // q21.33
1564008_at	COL27A1	85301	0003431 // growth plate cartilage chondrocyte development // inferred from electronic annotation///0030198 // extracellular matrix organization // traceable author statement	0005576 // extracellular region // traceable author statement///0005578 // proteinaceous extracellular matrix // inferred from electronic annotation///0005581 // collagen trimer // inferred from electronic annotation///0005583 // fibrillar collagen trimer // inferred from electronic annotation///0005788 // endoplasmic reticulum lumen // traceable author statement	0005201 // extracellular matrix structural constituent // inferred from electronic annotation///0046872 // metal ion binding // inferred from electronic annotation	chr9:116933575-116935888 (+) // 46.82 // q32
204298_s_at	LOX	4015	0001568 // blood vessel development // inferred from electronic annotation///0006464 // cellular protein modification process // traceable author statement///0009725 // response to hormone // inferred from electronic annotation///0030198 // extracellular matrix organization // traceable author statement///0030199 // collagen fibril organization // inferred from electronic annotation///0030324 // …	0005576 // extracellular region // traceable author statement///0005578 // proteinaceous extracellular matrix // inferred from electronic annotation///0005581 // collagen trimer // inferred from electronic annotation///0005615 // extracellular space // inferred from electronic annotation///0005634 // nucleus // inferred from electronic annotation	0004720 // protein-lysine 6-oxidase activity // inferred from electronic annotation///0005507 // copper ion binding // inferred from electronic annotation///0005515 // protein binding // inferred from physical interaction///0016491 // oxidoreductase activity // inferred from electronic annotation///0016641 // oxidoreductase activity, acting on the CH-NH2 group of donors, oxygen as acceptor // inf…	chr5:121402164-121413907 (-) // 98.03 // q23.2
213640_s_at	LOX	4015	0001568 // blood vessel development // inferred from electronic annotation///0006464 // cellular protein modification process // traceable author statement///0009725 // response to hormone // inferred from electronic annotation///0030198 // extracellular matrix organization // traceable author statement///0030199 // collagen fibril organization // inferred from electronic annotation///0030324 // …	0005576 // extracellular region // traceable author statement///0005578 // proteinaceous extracellular matrix // inferred from electronic annotation///0005581 // collagen trimer // inferred from electronic annotation///0005615 // extracellular space // inferred from electronic annotation///0005634 // nucleus // inferred from electronic annotation	0004720 // protein-lysine 6-oxidase activity // inferred from electronic annotation///0005507 // copper ion binding // inferred from electronic annotation///0005515 // protein binding // inferred from physical interaction///0016491 // oxidoreductase activity // inferred from electronic annotation///0016641 // oxidoreductase activity, acting on the CH-NH2 group of donors, oxygen as acceptor // inf…	chr5:121413202-121413764 (-) // 86.46 // q23.2
215446_s_at	LOX	4015	0001568 // blood vessel development // inferred from electronic annotation///0006464 // cellular protein modification process // traceable author statement///0009725 // response to hormone // inferred from electronic annotation///0030198 // extracellular matrix organization // traceable author statement///0030199 // collagen fibril organization // inferred from electronic annotation///0030324 // …	0005576 // extracellular region // traceable author statement///0005578 // proteinaceous extracellular matrix // inferred from electronic annotation///0005581 // collagen trimer // inferred from electronic annotation///0005615 // extracellular space // inferred from electronic annotation///0005634 // nucleus // inferred from electronic annotation	0004720 // protein-lysine 6-oxidase activity // inferred from electronic annotation///0005507 // copper ion binding // inferred from electronic annotation///0005515 // protein binding // inferred from physical interaction///0016491 // oxidoreductase activity // inferred from electronic annotation///0016641 // oxidoreductase activity, acting on the CH-NH2 group of donors, oxygen as acceptor // inf…	chr5:121400381-121402444 (-) // 99.47 // q23.2
202997_s_at	LOXL2	4017	0001666 // response to hypoxia // inferred from sequence or structural similarity///0001837 // epithelial to mesenchymal transition // inferred from direct assay///0001935 // endothelial cell proliferation // inferred from mutant phenotype///0002040 // sprouting angiogenesis // inferred from mutant phenotype///0006351 // transcription, DNA-templated // inferred from electronic annotation///000635…	0005576 // extracellular region // inferred from electronic annotation///0005578 // proteinaceous extracellular matrix // inferred from electronic annotation///0005604 // basement membrane // inferred from sequence or structural similarity///0005615 // extracellular space // inferred from direct assay///0005634 // nucleus // inferred from direct assay///0005634 // nucleus // traceable author stat…	0003682 // chromatin binding // inferred from direct assay///0003714 // transcription corepressor activity // inferred from direct assay///0004720 // protein-lysine 6-oxidase activity // inferred from direct assay///0005044 // scavenger receptor activity // inferred from electronic annotation///0005507 // copper ion binding // inferred from electronic annotation///0005515 // protein binding // in…	chr8:23154151-23261662 (-) // 99.38 // p21.3
202998_s_at	LOXL2	4017	0001666 // response to hypoxia // inferred from sequence or structural similarity///0001837 // epithelial to mesenchymal transition // inferred from direct assay///0001935 // endothelial cell proliferation // inferred from mutant phenotype///0002040 // sprouting angiogenesis // inferred from mutant phenotype///0006351 // transcription, DNA-templated // inferred from electronic annotation///000635…	0005576 // extracellular region // inferred from electronic annotation///0005578 // proteinaceous extracellular matrix // inferred from electronic annotation///0005604 // basement membrane // inferred from sequence or structural similarity///0005615 // extracellular space // inferred from direct assay///0005634 // nucleus // inferred from direct assay///0005634 // nucleus // traceable author stat…	0003682 // chromatin binding // inferred from direct assay///0003714 // transcription corepressor activity // inferred from direct assay///0004720 // protein-lysine 6-oxidase activity // inferred from direct assay///0005044 // scavenger receptor activity // inferred from electronic annotation///0005507 // copper ion binding // inferred from electronic annotation///0005515 // protein binding // in…	chr8:23154695-23261630 (-) // 99.8 // p21.3
202999_s_at	LOXL2	4017	0001666 // response to hypoxia // inferred from sequence or structural similarity///0001837 // epithelial to mesenchymal transition // inferred from direct assay///0001935 // endothelial cell proliferation // inferred from mutant phenotype///0002040 // sprouting angiogenesis // inferred from mutant phenotype///0006351 // transcription, DNA-templated // inferred from electronic annotation///000635…	0005576 // extracellular region // inferred from electronic annotation///0005578 // proteinaceous extracellular matrix // inferred from electronic annotation///0005604 // basement membrane // inferred from sequence or structural similarity///0005615 // extracellular space // inferred from direct assay///0005634 // nucleus // inferred from direct assay///0005634 // nucleus // traceable author stat…	0003682 // chromatin binding // inferred from direct assay///0003714 // transcription corepressor activity // inferred from direct assay///0004720 // protein-lysine 6-oxidase activity // inferred from direct assay///0005044 // scavenger receptor activity // inferred from electronic annotation///0005507 // copper ion binding // inferred from electronic annotation///0005515 // protein binding // in…	chr8:23154151-23198716 (-) // 99.22 // p21.3
203570_at	LOXL1	4016	0018277 // protein deamination // traceable author statement///0030198 // extracellular matrix organization // traceable author statement///0032496 // response to lipopolysaccharide // inferred from electronic annotation///0035904 // aorta development // inferred from electronic annotation///0055114 // oxidation-reduction process // traceable author statement	0001669 // acrosomal vesicle // inferred from electronic annotation///0005576 // extracellular region // traceable author statement///0005578 // proteinaceous extracellular matrix // inferred from electronic annotation///0005604 // basement membrane // inferred from electronic annotation///0005615 // extracellular space // inferred from electronic annotation///0005737 // cytoplasm // inferred fro…	0005507 // copper ion binding // inferred from electronic annotation///0016491 // oxidoreductase activity // inferred from electronic annotation///0016641 // oxidoreductase activity, acting on the CH-NH2 group of donors, oxygen as acceptor // inferred from electronic annotation///0046872 // metal ion binding // inferred from electronic annotation	chr15:74218819-74244476 (+) // 96.43 // q24.1
227145_at	LOXL4	84171	0006898 // receptor-mediated endocytosis // inferred from electronic annotation///0055114 // oxidation-reduction process // inferred from electronic annotation	0005576 // extracellular region // inferred from electronic annotation///0005615 // extracellular space // inferred from electronic annotation///0016020 // membrane // inferred from electronic annotation///0043235 // receptor complex // inferred from direct assay///0070062 // extracellular exosome // inferred from direct assay	0004720 // protein-lysine 6-oxidase activity // inferred from electronic annotation///0005044 // scavenger receptor activity // inferred from electronic annotation///0005507 // copper ion binding // inferred from electronic annotation///0005515 // protein binding // inferred from physical interaction///0016491 // oxidoreductase activity // inferred from electronic annotation///0016641 // oxidored…	chr10:100007444-100017533 (-) // 98.63 // q24.2
228253_at	LOXL3	84695	0001837 // epithelial to mesenchymal transition // inferred from direct assay///0006898 // receptor-mediated endocytosis // inferred from electronic annotation///0045892 // negative regulation of transcription, DNA-templated // inferred from direct assay///0055114 // oxidation-reduction process // inferred from electronic annotation	0005576 // extracellular region // inferred from direct assay///0005615 // extracellular space // inferred from electronic annotation///0005634 // nucleus // traceable author statement///0005737 // cytoplasm // inferred from electronic annotation///0016020 // membrane // inferred from electronic annotation	0004720 // protein-lysine 6-oxidase activity // non-traceable author statement///0005044 // scavenger receptor activity // inferred from electronic annotation///0005507 // copper ion binding // non-traceable author statement///0005515 // protein binding // inferred from physical interaction///0016491 // oxidoreductase activity // inferred from electronic annotation///0016641 // oxidoreductase act…	chr2:74760259-74762584 (-) // 90.69 // p13.1
228808_s_at	LOXL2	4017	0001666 // response to hypoxia // inferred from sequence or structural similarity///0001837 // epithelial to mesenchymal transition // inferred from direct assay///0001935 // endothelial cell proliferation // inferred from mutant phenotype///0002040 // sprouting angiogenesis // inferred from mutant phenotype///0006351 // transcription, DNA-templated // inferred from electronic annotation///000646…	0005604 // basement membrane // inferred from sequence or structural similarity///0005615 // extracellular space // inferred from direct assay///0005634 // nucleus // inferred from direct assay///0005634 // nucleus // traceable author statement///0005654 // nucleoplasm // inferred from direct assay///0005694 // chromosome // inferred from electronic annotation///0016020 // membrane // inferred fr…	0003682 // chromatin binding // inferred from direct assay///0003714 // transcription corepressor activity // inferred from direct assay///0004720 // protein-lysine 6-oxidase activity // inferred from direct assay///0005044 // scavenger receptor activity // inferred from electronic annotation///0005507 // copper ion binding // inferred from electronic annotation///0005515 // protein binding // in…	chr8:23167233-23177552 (+) // 97.52 // p21.3
1570219_at	LOXL4	84171	0006898 // receptor-mediated endocytosis // inferred from electronic annotation///0055114 // oxidation-reduction process // inferred from electronic annotation	0005576 // extracellular region // inferred from electronic annotation///0005615 // extracellular space // inferred from electronic annotation///0016020 // membrane // inferred from electronic annotation///0043235 // receptor complex // inferred from direct assay///0070062 // extracellular exosome // inferred from direct assay	0004720 // protein-lysine 6-oxidase activity // inferred from electronic annotation///0005044 // scavenger receptor activity // inferred from electronic annotation///0005507 // copper ion binding // inferred from electronic annotation///0005515 // protein binding // inferred from physical interaction///0016491 // oxidoreductase activity // inferred from electronic annotation///0016641 // oxidored…	chr10:100011779-100016329 (+) // 44.74 // q24.2
201042_at	TGM2	7052	0001974 // blood vessel remodeling // inferred from electronic annotation///0007200 // phospholipase C-activating G-protein coupled receptor signaling pathway // inferred from electronic annotation///0018149 // peptide cross-linking // inferred from electronic annotation///0018153 // isopeptide cross-linking via N6-(L-isoglutamyl)-L-lysine // inferred from electronic annotation///0032471 // negat…	0005737 // cytoplasm // inferred from electronic annotation///0005739 // mitochondrion // inferred from direct assay///0005783 // endoplasmic reticulum // inferred from mutant phenotype///0005829 // cytosol // inferred from direct assay///0005886 // plasma membrane // inferred from electronic annotation///0005925 // focal adhesion // inferred from direct assay///0031226 // intrinsic component of …	0003810 // protein-glutamine gamma-glutamyltransferase activity // inferred from mutant phenotype///0003810 // protein-glutamine gamma-glutamyltransferase activity // inferred from sequence or structural similarity///0005515 // protein binding // inferred from physical interaction///0005525 // GTP binding // inferred from electronic annotation///0016740 // transferase activity // inferred from el…	chr20:36756862-36790002 (-) // 84.84 // q11.23
206004_at	TGM3	7053	0006464 // cellular protein modification process // non-traceable author statement///0018149 // peptide cross-linking // inferred from direct assay///0030216 // keratinocyte differentiation // inferred from expression pattern///0030216 // keratinocyte differentiation // traceable author statement///0031069 // hair follicle morphogenesis // traceable author statement///0031424 // keratinization //…	0005737 // cytoplasm // inferred from direct assay///0031234 // extrinsic component of cytoplasmic side of plasma membrane // inferred from direct assay///0070062 // extracellular exosome // inferred from direct assay	0003810 // protein-glutamine gamma-glutamyltransferase activity // inferred from direct assay///0003824 // catalytic activity // inferred from direct assay///0005509 // calcium ion binding // inferred from direct assay///0016740 // transferase activity // inferred from electronic annotation///0016746 // transferase activity, transferring acyl groups // traceable author statement///0046872 // meta…	chr20:2276674-2321724 (+) // 98.17 // p13
206008_at	TGM1	7051	0006464 // cellular protein modification process // non-traceable author statement///0009887 // organ morphogenesis // inferred from electronic annotation///0018149 // peptide cross-linking // inferred from electronic annotation///0030216 // keratinocyte differentiation // inferred from direct assay///0031424 // keratinization // inferred from electronic annotation///0043163 // cell envelope orga…	0001533 // cornified envelope // traceable author statement///0005913 // cell-cell adherens junction // inferred from electronic annotation///0016020 // membrane // inferred from electronic annotation///0031224 // intrinsic component of membrane // inferred from direct assay///0070062 // extracellular exosome // inferred from direct assay	0003810 // protein-glutamine gamma-glutamyltransferase activity // inferred from direct assay///0005515 // protein binding // inferred from physical interaction///0016740 // transferase activity // inferred from electronic annotation///0016746 // transferase activity, transferring acyl groups // inferred from electronic annotation///0046872 // metal ion binding // inferred from electronic annotat…	chr14:24718321-24732372 (-) // 99.93 // q12
206260_at	TGM4	7047	0018149 // peptide cross-linking // inferred from electronic annotation///0042628 // mating plug formation // inferred from electronic annotation	0005737 // cytoplasm // inferred from direct assay///0005794 // Golgi apparatus // inferred from direct assay///0031012 // extracellular matrix // inferred from direct assay///0070062 // extracellular exosome // inferred from direct assay	0003810 // protein-glutamine gamma-glutamyltransferase activity // non-traceable author statement///0016740 // transferase activity // inferred from electronic annotation///0016746 // transferase activity, transferring acyl groups // inferred from electronic annotation///0046872 // metal ion binding // inferred from electronic annotation	chr3:44916126-44956093 (+) // 96.75 // p21.31
207911_s_at	TGM5	9333	0006464 // cellular protein modification process // traceable author statement///0008544 // epidermis development // traceable author statement///0018149 // peptide cross-linking // inferred from electronic annotation	0005737 // cytoplasm // inferred from electronic annotation	0003810 // protein-glutamine gamma-glutamyltransferase activity // inferred from electronic annotation///0016740 // transferase activity // inferred from electronic annotation///0016746 // transferase activity, transferring acyl groups // inferred from electronic annotation///0046872 // metal ion binding // inferred from electronic annotation	chr15:43525355-43552779 (-) // 99.13 // q15.2
211003_x_at	TGM2	7052	0007200 // phospholipase C-activating G-protein coupled receptor signaling pathway // inferred from electronic annotation///0018149 // peptide cross-linking // inferred from electronic annotation///0032471 // negative regulation of endoplasmic reticulum calcium ion concentration // inferred from mutant phenotype///0043065 // positive regulation of apoptotic process // inferred from mutant phenoty…	0005737 // cytoplasm // inferred from electronic annotation///0005739 // mitochondrion // inferred from direct assay///0005783 // endoplasmic reticulum // inferred from mutant phenotype///0005829 // cytosol // inferred from direct assay///0005925 // focal adhesion // inferred from direct assay///0031226 // intrinsic component of plasma membrane // inferred from direct assay///0031226 // intrinsic…	0003810 // protein-glutamine gamma-glutamyltransferase activity // inferred from mutant phenotype///0003810 // protein-glutamine gamma-glutamyltransferase activity // inferred from sequence or structural similarity///0005515 // protein binding // inferred from physical interaction///0016740 // transferase activity // inferred from electronic annotation///0016746 // transferase activity, transferr…	chr20:36766450-36793684 (-) // 96.63 // q11.23
211573_x_at	TGM2	7052	0007200 // phospholipase C-activating G-protein coupled receptor signaling pathway // inferred from electronic annotation///0018149 // peptide cross-linking // inferred from electronic annotation///0032471 // negative regulation of endoplasmic reticulum calcium ion concentration // inferred from mutant phenotype///0043065 // positive regulation of apoptotic process // inferred from mutant phenoty…	0005737 // cytoplasm // inferred from electronic annotation///0005739 // mitochondrion // inferred from direct assay///0005783 // endoplasmic reticulum // inferred from mutant phenotype///0005829 // cytosol // inferred from direct assay///0005925 // focal adhesion // inferred from direct assay///0031226 // intrinsic component of plasma membrane // inferred from direct assay///0031226 // intrinsic…	0003810 // protein-glutamine gamma-glutamyltransferase activity // inferred from mutant phenotype///0003810 // protein-glutamine gamma-glutamyltransferase activity // inferred from sequence or structural similarity///0005515 // protein binding // inferred from physical interaction///0016740 // transferase activity // inferred from electronic annotation///0016746 // transferase activity, transferr…	chr20:36766351-36793646 (-) // 88.43 // q11.23
216183_at	TGM2	7052	0007200 // phospholipase C-activating G-protein coupled receptor signaling pathway // inferred from electronic annotation///0018149 // peptide cross-linking // inferred from electronic annotation///0032471 // negative regulation of endoplasmic reticulum calcium ion concentration // inferred from mutant phenotype///0043065 // positive regulation of apoptotic process // inferred from mutant phenoty…	0005737 // cytoplasm // inferred from electronic annotation///0005739 // mitochondrion // inferred from direct assay///0005783 // endoplasmic reticulum // inferred from mutant phenotype///0005829 // cytosol // inferred from direct assay///0005925 // focal adhesion // inferred from direct assay///0031226 // intrinsic component of plasma membrane // inferred from direct assay///0031226 // intrinsic…	0003810 // protein-glutamine gamma-glutamyltransferase activity // inferred from mutant phenotype///0003810 // protein-glutamine gamma-glutamyltransferase activity // inferred from sequence or structural similarity///0005515 // protein binding // inferred from physical interaction///0016740 // transferase activity // inferred from electronic annotation///0016746 // transferase activity, transferr…	chr20:36765876-36768929 (-) // 69.25 // q11.23
217566_s_at	TGM4	7047	0018149 // peptide cross-linking // inferred from electronic annotation///0042628 // mating plug formation // inferred from electronic annotation	0005737 // cytoplasm // inferred from direct assay///0005794 // Golgi apparatus // inferred from direct assay///0031012 // extracellular matrix // inferred from direct assay///0070062 // extracellular exosome // inferred from direct assay	0003810 // protein-glutamine gamma-glutamyltransferase activity // non-traceable author statement///0016740 // transferase activity // inferred from electronic annotation///0016746 // transferase activity, transferring acyl groups // inferred from electronic annotation///0046872 // metal ion binding // inferred from electronic annotation	chr3:44947983-44948802 (+) // 71.26 // p21.31
217567_at	TGM4	7047	0018149 // peptide cross-linking // inferred from electronic annotation///0042628 // mating plug formation // inferred from electronic annotation	0005737 // cytoplasm // inferred from direct assay///0005794 // Golgi apparatus // inferred from direct assay///0031012 // extracellular matrix // inferred from direct assay///0070062 // extracellular exosome // inferred from direct assay	0003810 // protein-glutamine gamma-glutamyltransferase activity // non-traceable author statement///0016740 // transferase activity // inferred from electronic annotation///0016746 // transferase activity, transferring acyl groups // inferred from electronic annotation///0046872 // metal ion binding // inferred from electronic annotation	chr3:44947983-44948802 (+) // 71.26 // p21.31
233983_at	TGM6	343641	0018149 // peptide cross-linking // inferred from electronic annotation	0005737 // cytoplasm // inferred from direct assay	0003810 // protein-glutamine gamma-glutamyltransferase activity // inferred from direct assay///0016740 // transferase activity // inferred from electronic annotation///0016746 // transferase activity, transferring acyl groups // inferred from electronic annotation///0046872 // metal ion binding // inferred from electronic annotation	chr20:2397902-2413289 (+) // 96.82 // p13
237288_at	TGM7	116179	0018149 // peptide cross-linking // inferred from electronic annotation		0003810 // protein-glutamine gamma-glutamyltransferase activity // inferred from electronic annotation///0016740 // transferase activity // inferred from electronic annotation///0016746 // transferase activity, transferring acyl groups // inferred from electronic annotation///0046872 // metal ion binding // inferred from electronic annotation	chr15:43568478-43569185 (-) // 96.23 // q15.2
