# Supplementary material for: Anticancer Immunotherapy by MFAP5 Blockade Inhibits Fibrosis and Enhances Chemosensitivity in Ovarian and Pancreatic Cancer
Source: Oxford University Press journal article supplement (doi:10.1158/1078-0432.ccr-19-0187), 2019-07-22
Supplement: 10780432ccr190187-sup-215569_3_supp_5590619_pt8sbs.xlsx [file 10780432ccr190187-sup-215569_3_supp_5590619_pt8sbs.xlsx]

## Sheet: Correlation analysis results
Gene_Symbol	Pearson Correlation Coefficient	Pearson Correlation p value	Bonferroni adjusted p value	BH adjusted p value
COL11A1	0.872875	4.85e-20	1.09e-15	5.45e-16
COL12A1	0.855887	1.53e-18	3.43e-14	1.14e-14
KIF26B	0.842466	1.73e-17	3.89e-13	9.73e-14
FBN1	0.836959	4.39e-17	9.88e-13	1.98e-13
FZD1	0.833537	7.7e-17	1.73e-12	2.89e-13
GALNT1	0.831091	1.14e-16	2.57e-12	3.27e-13
GJB2	0.830981	1.16e-16	2.61e-12	3.27e-13
RUNX2	0.827522	2.01e-16	4.51e-12	5.01e-13
SPET11	0.823862	3.53e-16	7.93e-12	7.93e-13
THBS1	0.818654	7.7e-16	1.73e-11	1.57e-12
C1QTNF3	0.818022	8.46e-16	1.9e-11	1.58e-12
CHSY3	0.814352	1.44e-15	3.24e-11	2.49e-12
CCPG1///DYX1C1-CCPG1	0.808134	3.47e-15	7.8e-11	5.26e-12
FKBP14	0.808051	3.51e-15	7.89e-11	5.26e-12
ADAM12	0.806496	4.35e-15	9.78e-11	5.6e-12
HSD17B6	0.806464	4.37e-15	9.82e-11	5.6e-12
LUM	0.806281	4.48e-15	1.01e-10	5.6e-12
SGMS2	0.802908	7.08e-15	1.59e-10	8.38e-12
ALDH1L2	0.799011	1.19e-14	2.67e-10	1.34e-11
GLT8D2	0.792752	2.67e-14	6.01e-10	2.86e-11
COL5A2	0.791732	3.04e-14	6.84e-10	3.11e-11
EVI2A	0.791379	3.18e-14	7.15e-10	3.11e-11
LPAR1	0.789745	3.9e-14	8.78e-10	3.54e-11
LINC01614	0.789353	4.1e-14	9.22e-10	3.54e-11
TMEM2	0.78931	4.12e-14	9.27e-10	3.54e-11
ACVR2A	0.78907	4.25e-14	9.55e-10	3.54e-11
TMEM158	0.787737	5.01e-14	1.13e-09	3.93e-11
ZMAT3	0.787644	5.07e-14	1.14e-09	3.93e-11
CD109	0.786395	5.91e-14	1.33e-09	4.43e-11
CLMP	0.786078	6.14e-14	1.38e-09	4.46e-11
CDR2///LOC101060399	0.784218	7.71e-14	1.73e-09	5.42e-11
ASPN	0.783891	8.02e-14	1.8e-09	5.47e-11
SULF1	0.782485	9.51e-14	2.14e-09	6.29e-11
INHBA	0.782245	9.78e-14	2.2e-09	6.29e-11
PLPP4	0.781881	1.02e-13	2.3e-09	6.38e-11
FRMD6	0.781175	1.11e-13	2.5e-09	6.76e-11
PLPPR4	0.779046	1.43e-13	3.22e-09	8.46e-11
NUAK1	0.778841	1.47e-13	3.3e-09	8.46e-11
SERTAD2	0.778481	1.53e-13	3.44e-09	8.61e-11
LOX	0.778146	1.59e-13	3.58e-09	8.73e-11
FNDC1	0.77739	1.74e-13	3.91e-09	9.32e-11
VGLL3	0.773456	2.75e-13	6.18e-09	1.44e-10
COL8A1	0.771505	3.43e-13	7.72e-09	1.75e-10
PRSS23	0.769774	4.18e-13	9.39e-09	2.09e-10
ITGBL1	0.769239	4.43e-13	9.97e-09	2.17e-10
GNB4	0.768909	4.6e-13	1.03e-08	2.2e-10
ITGB5	0.766625	5.94e-13	1.34e-08	2.78e-10
EPYC	0.766082	6.31e-13	1.42e-08	2.89e-10
PLXDC2	0.765628	6.63e-13	1.49e-08	2.98e-10
PCDH7	0.764468	7.53e-13	1.69e-08	3.32e-10
MARCKS	0.764108	7.84e-13	1.76e-08	3.34e-10
ST6GALNAC5	0.764067	7.87e-13	1.77e-08	3.34e-10
SMYD3	0.763323	8.54e-13	1.92e-08	3.55e-10
TIMP3	0.763161	8.69e-13	1.95e-08	3.55e-10
MSRB3	0.762961	8.88e-13	2e-08	3.57e-10
NT5E	0.762685	9.15e-13	2.06e-08	3.57e-10
XYLT1	0.762629	9.21e-13	2.07e-08	3.57e-10
GXYLT2	0.761461	1.05e-12	2.35e-08	3.98e-10
ENPP1	0.75992	1.23e-12	2.77e-08	4.62e-10
ACSL1	0.759655	1.27e-12	2.86e-08	4.68e-10
VCAN	0.758048	1.51e-12	3.39e-08	5.47e-10
DEPDC7	0.756838	1.71e-12	3.85e-08	6.12e-10
PDGFRL	0.755781	1.92e-12	4.31e-08	6.73e-10
MICAL2	0.754537	2.18e-12	4.91e-08	7.36e-10
PLAU	0.754532	2.18e-12	4.91e-08	7.36e-10
PTPRD	0.754436	2.21e-12	4.96e-08	7.36e-10
CLIC4	0.754311	2.24e-12	5.03e-08	7.36e-10
STK17B	0.754212	2.26e-12	5.08e-08	7.36e-10
CTSK	0.754012	2.31e-12	5.19e-08	7.41e-10
ANTXR1	0.753285	2.49e-12	5.59e-08	7.74e-10
GPR137B	0.753275	2.49e-12	5.6e-08	7.74e-10
SLC44A1	0.753193	2.51e-12	5.65e-08	7.74e-10
SLC2A10	0.753025	2.56e-12	5.75e-08	7.77e-10
TRIM59	0.750781	3.22e-12	7.25e-08	9.56e-10
SDC1	0.750758	3.23e-12	7.26e-08	9.56e-10
DAB2	0.750515	3.31e-12	7.45e-08	9.67e-10
CLEC2B	0.749497	3.68e-12	8.27e-08	1.06e-09
FAM107B	0.749266	3.76e-12	8.46e-08	1.07e-09
SHISA2	0.748066	4.25e-12	9.56e-08	1.2e-09
KATNAL1	0.747809	4.37e-12	9.82e-08	1.21e-09
LRRC15	0.745324	5.61e-12	1.26e-07	1.54e-09
COPZ2	0.744941	5.83e-12	1.31e-07	1.58e-09
PARVA	0.743803	6.53e-12	1.47e-07	1.75e-09
SPAG9	0.74288	7.15e-12	1.61e-07	1.89e-09
SMIM3	0.742794	7.22e-12	1.62e-07	1.89e-09
SLC12A8	0.742558	7.39e-12	1.66e-07	1.91e-09
COLEC12	0.740933	8.67e-12	1.95e-07	2.21e-09
CDH11	0.740393	9.14e-12	2.06e-07	2.31e-09
DYNLT3	0.740261	9.26e-12	2.08e-07	2.31e-09
CASK	0.73944	1e-11	2.26e-07	2.48e-09
KDELR3	0.73796	1.16e-11	2.6e-07	2.83e-09
WSB2	0.737051	1.26e-11	2.84e-07	3.05e-09
COL10A1	0.736974	1.27e-11	2.87e-07	3.05e-09
MFAP3L	0.736851	1.29e-11	2.9e-07	3.05e-09
SUGCT	0.736618	1.32e-11	2.97e-07	3.09e-09
RCAN1	0.734896	1.56e-11	3.5e-07	3.53e-09
NDFIP2	0.734853	1.56e-11	3.51e-07	3.53e-09
EMB	0.734799	1.57e-11	3.53e-07	3.53e-09
SMCO4	0.734699	1.59e-11	3.56e-07	3.53e-09
PRRX1	0.734694	1.59e-11	3.57e-07	3.53e-09
CCDC80///LINC01279	0.734582	1.6e-11	3.6e-07	3.53e-09
NTM	0.734365	1.64e-11	3.68e-07	3.57e-09
RIC1	0.731917	2.06e-11	4.64e-07	4.46e-09
WDR41	0.730506	2.36e-11	5.3e-07	5.05e-09
TMEM47	0.730102	2.45e-11	5.5e-07	5.19e-09
P4HA1	0.729158	2.67e-11	6.01e-07	5.62e-09
YIPF5	0.728974	2.72e-11	6.11e-07	5.66e-09
TUBB2A	0.72844	2.86e-11	6.43e-07	5.9e-09
CRISPLD2	0.728242	2.91e-11	6.55e-07	5.95e-09
SFRP2	0.727571	3.1e-11	6.96e-07	6.27e-09
CCDC80	0.726712	3.35e-11	7.54e-07	6.73e-09
SNX7	0.726538	3.41e-11	7.66e-07	6.78e-09
CSGALNACT2	0.72619	3.52e-11	7.91e-07	6.94e-09
TMEM165	0.725569	3.72e-11	8.37e-07	7.21e-09
COL8A2	0.725498	3.75e-11	8.43e-07	7.21e-09
C3orf80	0.725486	3.75e-11	8.44e-07	7.21e-09
RAB23	0.725086	3.89e-11	8.75e-07	7.42e-09
UHRF1BP1L	0.723882	4.35e-11	9.77e-07	8.21e-09
INPP5F	0.723765	4.39e-11	9.87e-07	8.23e-09
WIPF1	0.723591	4.46e-11	1e-06	8.29e-09
ATL1	0.723445	4.52e-11	1.02e-06	8.33e-09
ALDH18A1	0.723299	4.58e-11	1.03e-06	8.38e-09
GLIS2	0.722789	4.8e-11	1.08e-06	8.7e-09
P4HA2	0.722561	4.9e-11	1.1e-06	8.81e-09
PPIC	0.721618	5.33e-11	1.2e-06	9.52e-09
NNMT	0.721341	5.47e-11	1.23e-06	9.68e-09
GLIPR1	0.720979	5.65e-11	1.27e-06	9.92e-09
PNMA2	0.720817	5.73e-11	1.29e-06	9.92e-09
COL5A1	0.720814	5.73e-11	1.29e-06	9.92e-09
IKBIP	0.720574	5.86e-11	1.32e-06	1.01e-08
TICAM2///TMED7-TICAM2	0.720363	5.97e-11	1.34e-06	1.02e-08
POSTN	0.720012	6.16e-11	1.39e-06	1.04e-08
TPBG	0.719421	6.5e-11	1.46e-06	1.09e-08
PRICKLE1	0.719315	6.56e-11	1.47e-06	1.09e-08
GPC4	0.718931	6.79e-11	1.53e-06	1.12e-08
GPX8	0.718661	6.95e-11	1.56e-06	1.14e-08
TNFSF4	0.718344	7.15e-11	1.61e-06	1.16e-08
MLLT11	0.718242	7.22e-11	1.62e-06	1.16e-08
STK17A	0.718219	7.23e-11	1.63e-06	1.16e-08
THBS2	0.718152	7.27e-11	1.64e-06	1.16e-08
SPARC	0.718115	7.3e-11	1.64e-06	1.16e-08
KDSR	0.716854	8.16e-11	1.83e-06	1.28e-08
TANC2	0.715318	9.34e-11	2.1e-06	1.46e-08
DOCK11	0.715051	9.56e-11	2.15e-06	1.48e-08
MOXD1	0.715011	9.6e-11	2.16e-06	1.48e-08
FAM69A	0.714843	9.74e-11	2.19e-06	1.49e-08
MAN2A1	0.714669	9.89e-11	2.22e-06	1.5e-08
CEMIP	0.714233	1.03e-10	2.31e-06	1.55e-08
NAT1	0.713295	1.11e-10	2.51e-06	1.67e-08
UTP14C	0.713047	1.14e-10	2.56e-06	1.7e-08
PRKG1	0.712615	1.18e-10	2.66e-06	1.75e-08
FUT11	0.712465	1.2e-10	2.69e-06	1.76e-08
ATP10D	0.711333	1.32e-10	2.97e-06	1.91e-08
KDELR2	0.711279	1.33e-10	2.98e-06	1.91e-08
C6orf120	0.710949	1.37e-10	3.07e-06	1.96e-08
PPP3CA	0.710463	1.42e-10	3.2e-06	2.03e-08
HS3ST3B1	0.709565	1.54e-10	3.46e-06	2.18e-08
C12orf75	0.70802	1.75e-10	3.95e-06	2.47e-08
GAS1	0.70688	1.93e-10	4.35e-06	2.7e-08
ANKRD13C	0.706409	2.01e-10	4.52e-06	2.79e-08
FNIP2	0.706138	2.06e-10	4.63e-06	2.84e-08
PTS	0.705983	2.09e-10	4.69e-06	2.86e-08
GFPT1	0.705154	2.24e-10	5.03e-06	3.05e-08
HCFC2	0.70509	2.25e-10	5.06e-06	3.05e-08
FKBP7	0.704877	2.29e-10	5.15e-06	3.08e-08
CTHRC1	0.704494	2.36e-10	5.31e-06	3.16e-08
DNAJB4	0.703826	2.5e-10	5.62e-06	3.33e-08
DSE	0.702917	2.7e-10	6.06e-06	3.56e-08
BCAR3	0.702826	2.72e-10	6.11e-06	3.56e-08
PICALM	0.70268	2.75e-10	6.18e-06	3.56e-08
GJA1	0.702673	2.75e-10	6.19e-06	3.56e-08
MAGEL2	0.702654	2.76e-10	6.2e-06	3.56e-08
TMTC3	0.702393	2.82e-10	6.33e-06	3.62e-08
DIP2C	0.701772	2.97e-10	6.67e-06	3.79e-08
TMEM200A	0.700708	3.24e-10	7.28e-06	4.11e-08
GPC6	0.700473	3.3e-10	7.43e-06	4.17e-08
